1 **Differential timing for glucose assimilation in *Prochlorococcus* and coexistent microbial**  
2 **populations at the North Pacific Subtropical Gyre**

3

4 **Running title –Diel changes in glucose assimilation by *Prochlorococcus***

5

6 María del Carmen Muñoz-Marín<sup>1</sup>, Solange Duhamel<sup>2,+</sup>, Karin M. Björkman<sup>3</sup>, Jonathan D.

7 Magasin<sup>4</sup>, Jesús Díez<sup>1</sup>, David M. Karl<sup>3</sup>, and José M. García-Fernández<sup>1</sup>

8

9 <sup>1</sup>Departamento de Bioquímica y Biología Molecular, Campus de Excelencia Internacional

10 Agroalimentario, Universidad de Córdoba, Córdoba, 14014, Spain

11 <sup>2</sup>Lamont-Doherty Earth Observatory of Columbia University, Division of Biology and Paleo

12 Environment, PO Box 1000, 61 Route 9W, Palisades, NY 10964, USA

13 <sup>3</sup>Daniel K. Inouye Center for Microbial Oceanography: Research and Education (C-MORE),

14 University of Hawaii at Manoa, C-MORE Hale, 1950 East West Road, Honolulu, HI 96822,

15 USA

16 <sup>4</sup> Ocean Sciences Department, University of California, Santa Cruz, CA, 95064, USA.

17 <sup>+</sup>Now at: Department of Cellular and Molecular Biology, University of Arizona, Tucson, AZ

18 85721, USA

19

20 Corresponding author:

21 María del Carmen Muñoz-Marín

22 <sup>1</sup>Departamento de Bioquímica y Biología Molecular, Campus de Excelencia Internacional

23 Agroalimentario, Universidad de Córdoba, Córdoba, Spain

24 Email address: b32mumam@uco.es

25 **Abstract**

26 The marine cyanobacterium *Prochlorococcus* can utilize glucose as a source of carbon.  
27 However, the relative importance of inorganic and organic carbon assimilation and the timing of  
28 glucose assimilation are still poorly understood in these numerically dominant cyanobacteria. Here  
29 we investigated whole microbial community and group-specific primary production and glucose  
30 assimilation, using incubations with radioisotopes combined with flow cytometry cell sorting. We  
31 also studied changes in the microbial community structure in response to glucose enrichments and  
32 analyzed the transcription of *Prochlorococcus* genes involved in carbon metabolism and  
33 photosynthesis.

34 Our results showed a circadian rhythm for glucose assimilation in *Prochlorococcus*, with  
35 maximum assimilation during the midday and minimum at midnight, which was different  
36 compared with that of the total microbial community. This suggests that rhythms in glucose  
37 assimilation have been adapted in *Prochlorococcus* to couple the active transport to photosynthetic  
38 light reactions producing energy, and possibly to avoid competition from the rest of the microbial  
39 community. High-light *Prochlorococcus* strains showed most transcriptional changes upon  
40 glucose enrichment. Pathways involved in glucose metabolism as the pentose phosphate, the  
41 Entner-Dudoroff, glycolysis, respiration and glucose transport showed an increase in the transcript  
42 level. A few genes of the low-light strains showed opposite changes, suggesting that glucose  
43 assimilation has been subjected to diversification along the *Prochlorococcus* evolution.

44

45

46 **Keywords:** Glucose assimilation, cyanobacteria, *Prochlorococcus*, assimilation, diel cycles

47

## 48 **Introduction**

49 *Prochlorococcus* is the most abundant photosynthetic organism on Earth, contributing to an  
50 important part of the total primary production (1-4). The outstanding relevance of this  
51 microorganism in the field of marine microbiology and ecology has been demonstrated by a  
52 large series of studies published since its discovery, ca. 35 years ago (5). Because of its  
53 abundance, *Prochlorococcus* is also one of the main microbial players in biogeochemical cycles  
54 (6).

55 Early studies on this cyanobacterium were focused on photosynthesis, and it was widely  
56 considered an obligate photolithoautotrophic organism. However, it has been showed recently  
57 that *Prochlorococcus* can take up and use organic compounds, such as amino acids (containing  
58 nitrogen) (7, 8), DMSP (containing sulfur) (9) or phosphonates and adenosine triphosphate  
59 (ATP) (containing phosphorus) (10, 11), which recently has been reviewed (12). Since  
60 *Prochlorococcus* is adapted to thrive in very oligotrophic regions of the ocean, the use of those  
61 organic molecules was thought to be linked to their content in limiting elements. In this context,  
62 the discovery of glucose assimilation in *Prochlorococcus* was surprising (13), since this  
63 molecule is devoid of limiting element, containing only carbon, oxygen and hydrogen. However,  
64 it also contains potential energy which could be used by *Prochlorococcus*. Glucose addition to  
65 *Prochlorococcus* culture medium induced changes in the expression of a number of genes,  
66 including *glcH*, which encodes a multiphasic transporter with high affinity constant ( $K_s$ ) in the  
67 nanomolar range (14). The ubiquity of this gene in all sequenced genomes of *Prochlorococcus*  
68 and marine *Synechococcus*, and the diversity of kinetics of the transporter ( $K_s$  and  $V_{max}$   
69 parameters) (15), suggest that *glcH* is very important for *Prochlorococcus* and *Synechococcus*,  
70 and has been subjected to selective evolution in their genomes (12, 15).

71 The effects of glucose addition to *Prochlorococcus* in culture isolates showed specific  
72 increases in the expression of genes related to glucose metabolism (13). Proteomic analysis  
73 showed some changes which were reproducible but quantitatively small (15), including in  
74 proteins related to glucose metabolism. Besides, the expression of *glcH* has been shown to  
75 increase with higher concentrations of glucose in *Prochlorococcus* cultures, but to decrease in  
76 the dark (16). However, less is known about *Prochlorococcus* glucose utilization in the wild:  
77 glucose assimilation was demonstrated in natural populations of *Prochlorococcus* in the Atlantic  
78 (14) and in the Southwest Pacific (11) oceans; furthermore, it was shown that *Prochlorococcus*  
79 glucose assimilation in the field was reduced in the dark and in the presence of photosynthesis  
80 inhibitors (11).

81 Here, we further address *Prochlorococcus* glucose metabolism in field experiments carried  
82 out at Station ALOHA in the North Pacific Subtropical Gyre (NPSG) to determine how glucose  
83 addition affects the total microbial community during light-dark cycles. We measured glucose  
84 turnover rates and assimilation by the whole microbial community as well as in flow  
85 sorted *Prochlorococcus* over a diel cycle. Paired experiments measuring primary production  
86 were conducted in order to assess the relative contribution of glucose assimilation  
87 to *Prochlorococcus* total carbon assimilation. We used metagenomics to investigate the effect of  
88 glucose enrichment on the composition of natural populations (both picocyanobacteria and  
89 heterotrophic bacteria) and analyzed *Prochlorococcus* populations using microarrays to identify  
90 possible changes in the transcription of genes involved in carbon metabolism and photosynthesis  
91 pathways.

92

93

## 94 **Material and Methods**

### 95 *Field sampling*

96 Seawater for all incubation experiments was collected at Station ALOHA (22° 45' N,  
97 158° 00' W) in the NPSG, during the KM1715 (HOT-296) cruise on October 5–9<sup>th</sup>, 2017. The  
98 seawater was sampled from a depth of 7 m using the RV Kilo Moana's uncontaminated seawater  
99 system (<https://www.soest.hawaii.edu/UMC/cms/KiloMoana.php>). The surface light flux values  
100 measured during the experiments are shown in Table S1.

101

### 102 *Incubation experiments with radiolabeled substrates*

103 Separate incubation experiments were carried out to determine primary production, using  
104 <sup>14</sup>C-sodium bicarbonate (MP Biomedical 117441H; specific activity 2.22 TBq mmol<sup>-1</sup>), and the  
105 turnover and assimilation of glucose by *Prochlorococcus* and the whole microbial community,  
106 using both <sup>14</sup>C-glucose and <sup>3</sup>H-glucose (NEC042X (<sup>14</sup>C (U)); specific activity 9.7 GBq mmol<sup>-1</sup>  
107 and 97% radiochemical purity, Perkin-Elmer NET100C (D-[6-<sup>3</sup>H(N)]); specific activity 1.83  
108 TBq mmol<sup>-1</sup> and 97% radiochemical purity). The radiolabeled glucose was also used to estimate  
109 the ambient glucose concentration in the seawater. These incubations were performed in 60 ml or  
110 100 ml clear polycarbonate bottles that had been acid cleaned and ultra-pure water rinsed before  
111 rinsing with sample seawater. The seawater samples were spiked with the relevant radioisotope  
112 and incubated in on deck incubators with surface seawater cooling and blue shielding at 60% of  
113 full surface light.

114

### 115 *Estimation of ambient glucose concentrations*

116 To estimate the ambient concentration of glucose in the surface seawaters at Station  
117 ALOHA, concentration series bioassays were carried out on the HOT 295, 296 and 298 cruises  
118 (Sep, Oct and Dec 2017, respectively) following the procedure described by Wright and Hobbie  
119 (17, 18) and modified by Zubkov and Tarran (19). Surface seawater was amended with  
120 increasing amounts of radiolabeled glucose, either as  $^3\text{H}$ -glucose (HOT 296, 298) or  $^{14}\text{C}$ -glucose  
121 (HOT 295, 298), incubated in the on-deck incubators and subsampled in a time-course  
122 fashion. For that, radioactive glucose was added at five to six different concentrations within a  
123 target range of 0.2–2.0 nmol glucose  $\text{l}^{-1}$ . Each target concentration was run as duplicate  
124 incubations. The incubations were subsampled after 30, 60, 90, 120 and 240 minutes. The 4  
125 hours timepoint was used as validation for the 4 hours incubation times used in the diel study. On  
126 HOT 295 incubations started at 12:30 h and used  $^{14}\text{C}$ -glucose only. During HOT 296 two  
127 bioassays were run using  $^3\text{H}$ -glucose with incubations started at 07:10 h on 6<sup>th</sup> Oct, and at 09:40  
128 on the 7<sup>th</sup> of Oct. Two additional bioassays were performed on HOT 298 using both  $^3\text{H}$ - and  $^{14}\text{C}$ -  
129 glucose and started at noon Dec 14<sup>th</sup>. At each sampling time, 10 ml were filtered onto 0.2  $\mu\text{m}$   
130 polycarbonate filters, rinsed with filtered seawater and placed into plastic scintillation vials  
131 (Simport snap-twist vials, 7 ml). A small subsample (25  $\mu\text{l}$ ) was also collected from each  
132 incubation bottle to determine the total radioactivity used to calculate the added glucose  
133 concentration from the specific activity provided by the manufacturer of each isotope.

134 Glucose turnover times were determined by dividing the total radioactivity by the  
135 assimilation rate, where the rate of assimilation was derived from the linear regression of the  
136 increase in particulate radioactivity over time. By plotting the turnover times against the  
137 concentrations of added glucose, the ambient concentration of glucose can be derived from  
138 where the linear regression line intersects the x-axis ( $y=0$ , absolute value). The final glucose

139 assimilation rates were calculated from the ambient + added glucose concentrations. Further  
140 details of the bioassay method have been described by Zubkov et al. (20).

141

#### 142 *Diel assimilation*

143 Seawater samples were collected every 6 h for a total of 10 samplings over a 54-h period.  
144 Duplicate 60 ml bottles were spiked with radiolabeled glucose to a target addition of 2 nM  
145 glucose or with  $^{14}\text{C}$ -sodium bicarbonate (final activity approximately  $150 \text{ MBq l}^{-1}$ ). Each sample  
146 set included a paraformaldehyde killed control (0.24 % final concentration) that was incubated  
147 alongside the live samples. The diel samples were incubated for 4 h and terminated by adding  
148 paraformaldehyde (0.24% final concentration) to stop the assimilation of the radiolabel and  
149 preserve the sample. The primary production incubations were treated the same way as the  
150 glucose incubations during daylight hours but these samples were kept in the incubator overnight  
151 (from 18:30 to 04:00), under the assumption that primary productivity during the night would be  
152 negligible. At the end of the incubation period, 5 ml subsamples from each incubation were  
153 filtered onto  $0.2 \mu\text{m}$  polycarbonate filters, rinsed with filtered seawater and placed either into  
154 plastic scintillation vials (Simport snap-twist scintillation vials, 7 ml) for glucose or into 20 ml  
155 borosilicate scintillation vials for  $^{14}\text{C}$ -sodium bicarbonate. The latter were acidified (1 ml 2N  
156 HCl) and vented for 24 h before the addition of scintillation cocktail. The total radioactivity  
157 subsamples for  $^{14}\text{C}$ -bicarbonate were trapped with phenethylamine (Sigma Aldrich 407267).  
158 Ultima Gold LLT (Perkin-Elmer) was used as the scintillation cocktail for all radioassays in a  
159 Packard Tri-Carb® liquid scintillation counter. Dissolved inorganic carbon concentrations for  
160 HOT 296 were from the HOT Data Organization and Graphical System

161 (<http://hahana.soest.hawaii.edu/hot/hot-dogs>), and a correction of 1.06 for preferential  
162 assimilation of  $^{12}\text{C}$  relative to  $^{14}\text{C}$  was applied (21).

163 Subsamples for flow cytometric cell counts were taken in duplicate 2 ml samples, fixed  
164 with paraformaldehyde (0.24% final concentration) and incubated for 15 min in the dark before  
165 flash freezing and storing at  $-80^{\circ}\text{C}$  until analysis back in the laboratory. The remaining sample  
166 volume from each incubation was concentrated as described in Duhamel et al. (3, 11) for cell  
167 sorting to determine cell and group specific assimilation of glucose and inorganic carbon by  
168 *Prochlorococcus*.

169

#### 170 *Flow cytometry counting and cell sorting*

171 Phytoplankton groups were enumerated using a BD Influx flow cytometer equipped with  
172 a forward scatter (FSC) detector with small particle option (BD Biosciences, San Jose, CA,  
173 USA). *Prochlorococcus*, *Synechococcus*, *Crocospaera* and pigmented eukaryotes ( $<5\text{-}\mu\text{m}$  (3))  
174 were enumerated in unstained samples following published protocols (22). Briefly, cells were  
175 identified based on red fluorescence signals vs FSC, then further gated by FSC and orange  
176 fluorescence (Fig. S1). The high phycoerythrin (orange) signal in *Synechococcus* and  
177 *Crocospaera* was used to distinguish them from *Prochlorococcus* and pigmented eukaryotes. A  
178 488 plus a 457 nm (200 and 300 mW solid state, respectively) laser focused into the same  
179 pinhole resolved dim surface *Prochlorococcus* population from background noise in a FSC vs  
180 red fluorescence plot. Potential particle aggregates were discarded using a pulse width vs.  
181 forward scatter plot. Calibration and alignment were done using  $1\text{-}\mu\text{m}$  yellow-green  
182 microspheres (Polysciences, USA).



183 Group-specific rates of  $^3\text{H}$ -glucose /  $^{14}\text{C}$ -glucose assimilation and primary production by  
184 *Prochlorococcus* were determined by measuring the amount of radioactivity assimilated into  
185 populations sorted using the BD Influx (100  $\mu\text{m}$  nozzle tip, sheath solution (sodium chloride 6 g  
186  $\text{L}^{-1}$  in ultrapure water and filtered in-line through a 0.22- $\mu\text{m}$  Sterivex™ filter unit), 1.0 drop  
187 single mode) according to Duhamel et al., (3, 11).

188 The drop delay was calibrated using Accudrop Beads (BD Biosciences, USA) and sorting  
189 efficiency was verified manually by sorting a specified number of 1- $\mu\text{m}$  yellow-green  
190 microspheres (Polysciences, USA) onto a glass slide and counting the beads under an  
191 epifluorescence microscope. We systematically recovered 100% of the targeted beads before  
192 sorting cells. For each sample, 50,000 *Prochlorococcus* cells were sorted, filtered onto 0.2- $\mu\text{m}$   
193 polycarbonate membranes, rinsed with filtered seawater, and assayed by liquid scintillation  
194 counting ( $\text{dpm cell}^{-1}$ ). The  $^{14}\text{C}$ -labeled samples were acidified with 1 mL of 2M HCl for 24 h to  
195 remove any unincorporated  $^{14}\text{C}$ -sodium bicarbonate before adding the scintillation cocktail.  
196 Radioactivity per cell ( $\text{dpm cell}^{-1}$ ) measured in the killed control samples was subtracted from  
197 radioactivity per cell measured in the respective sample. On average, radioactivity in the killed  
198 controls for 50,000 *Prochlorococcus* cells sorted (i.e., blanks) was  $5 \pm 2 \times 10^{-5}$  and  $4.7 \pm 1.3 \times 10^{-4}$   
199  $\text{dpm cell}^{-1}$  for  $^3\text{H}$ -glucose and  $^{14}\text{C}$ -sodium bicarbonate, respectively. Detection limits are defined  
200 as 2X the killed control before it being subtracted from the sample. The cell-specific assimilation  
201 rate ( $\text{nmol cell}^{-1} \text{h}^{-1}$ ) was calculated by dividing the radioactivity per cell ( $\text{dpm cell}^{-1}$ ) by the total  
202 microbial activity ( $\text{dpm l}^{-1}$ ) measured in the same treatment, and then multiplied by the total  
203 microbial assimilation rate at ambient plus added organic substrate concentration ( $S_a + S^*$ ,  $\text{nmol}$   
204  $\text{l}^{-1} \text{h}^{-1}$ ) as described in Duhamel and coworkers (11).

205

206 *Incubation experiments with glucose for genomics-based approaches*

207 For molecular approaches seawater was collected into 2 L polycarbonate bottles in  
208 triplicate control and glucose amended samples. The glucose treatments were spiked with 0.1  
209  $\mu\text{M}$  of non-radiolabeled glucose and incubated alongside the controls (unamended) in the on-  
210 deck incubators. For the first experiment (October 6<sup>th</sup>), surface seawater was sampled at noon,  
211 while for the second experiment (October 7<sup>th</sup>) surface seawater was collected at 16:00.

212 Samples were collected for these two experiments, and for each one, two technical  
213 replicates were collected at 3 different times: after 4h, 12h and 24h of incubation, in the presence  
214 of glucose or in the control treatment. Therefore, samples are identified as follows: 4h\_glucose,  
215 4h\_control, 12h\_glucose, 12h\_control, 24h\_glucose, 24h\_control, 2D\_4h\_glucose,  
216 2D\_4h\_control, 2D\_12h\_glucose, 2D\_12h\_control, 2D\_24h\_glucose, 2D\_24h\_control with the  
217 second experiment identified as “2D” and considered as biological replicates. The different  
218 technical replicates are labeled with the number 1 or 2 before the treatment, e.g. (4h\_1glucose  
219 and 4h\_2glucose.

220 At each sampling time point, RNA and DNA samples were collected by filtering 4 L and  
221 1 L of seawater, respectively onto 0.22  $\mu\text{m}$  pore-size Sterivex cartridges (Millipore Corp.,  
222 Billerica, MA, USA) using a peristaltic pump set at low rate to maintain low pressure. Filters  
223 were opened and carefully placed in sterile 2 ml bead-beating tubes with sterile glass beads and  
224 stored at -80 °C until extraction.

225

226 *DNA extraction*

227 DNA extractions were carried out with a modification of the Qiagen DNeasy Plant Kit  
228 (23). Briefly, 400  $\mu\text{l}$  lysis buffer (AP1 buffer) was added to the bead-beating tubes, followed by

229 three sequential freeze-thaw cycles using liquid nitrogen and a 65°C water bath. The tubes were  
230 agitated for 2 min with a Vortex-Genie 2 bead beater (Scientific Industries, Inc), and incubated  
231 for 1 h at 55°C with 20 mg ml<sup>-1</sup> proteinase K (Qiagen). Samples were treated for 10 min at 65 °C  
232 with 4 µl RNase A (100 mg ml<sup>-1</sup>) and then the filters were removed using sterile needles. The  
233 tubes were centrifuged for 5 min at 16,873 x g at 4°C, and the supernatant was further purified  
234 using the manufacturer's protocol (Qiagen). Samples were eluted using 100 µl of the elution  
235 buffer (AE buffer) and stored at 20°C.

236 Sufficient environmental DNA was obtained for two technical replicates only in 5  
237 samples (2D\_4h\_glucose, 2D\_12h\_glucose, 2D\_12h\_control, 2D\_24h\_glucose,  
238 2D\_24h\_glucose) and those samples are identified as follows: 2D\_4h\_1glucose,  
239 2D\_4h\_2glucose, 2D\_12h\_1glucose, 2D\_12h\_2glucose, 2D\_12h\_1control, 2D\_12h\_2control,  
240 2D\_24h\_1glucose, 2D\_24h\_2glucose, 2D\_24h\_1glucose and 2D\_24h\_2glucose.

241

#### 242 *Sequence processing*

243 V3 and V4 regions of 16S rRNA genes were amplified, sequenced and analyzed by the  
244 STAB-VIDA company (Lisbon, Portugal) using the following primers (24): forward primer  
245 5'CCTACGGGNGGCWGCAG-3 and reverse primer 5'-GACTACHVGGGTATCTAATCC-3.  
246 DNA samples were checked for quantity and integrity by 1% Agarose gel electrophoresis, a  
247 Qubit® Fluorometer (Thermo Fisher Scientific, MA, USA) and a 2100 Bioanalyzer (Agilent  
248 Technologies, Santa Clara, CA, USA) prior to library construction using the Illumina 16S  
249 Metagenomic Sequencing Library Preparation protocol (25). The generated DNA fragments  
250 (DNA libraries) were sequenced with the Illumina MiSeq platform using MiSeq Reagent Kit v2  
251 to produce paired-end sequencing reads (2×250 bp). FastQC (26) was used to inspect the quality

252 of the raw sequencing reads. The analysis of the generated raw sequence data was carried out  
253 using QIIME2 v2018.2 (27). The QIIME2 plugin for DADA2 (denoise-paired) (28) was used to  
254 process the raw reads into amplicon sequence variants (ASVs) which provide higher  
255 phylogenetic resolution compared to operational taxonomic units (OTUs). Reads were trimmed  
256 of primers at the 5' end using the primer lengths and truncated at the 3' end so that total lengths  
257 were 250 bp (R1) and 235 bp (R2). Reads were removed if they had Phred quality scores <20 on  
258 average, or <17 for two consecutive bases, or if they had >2 expected errors. Quality-filtered  
259 reads were then dereplicated, denoised (ASV inference using the core DADA2 algorithm),  
260 merged, and filtered for chimeras.

261 The 1534 ASVs identified by DADA2 were additionally filtered for chimera using the  
262 uchime3\_denovo algorithm implemented in vsearch v2.13.3 (29) which identified 53 chimera,  
263 and the NCBI 16S rRNA chimera detection pipeline based on uchime2\_ref (30) which identified  
264 452 chimera. One of the 452 chimera (ASV.348) was retained because it was observed in 12  
265 samples (198 sequences total) and had taxonomically consistent parents (genus *Coxiella*). From  
266 the 1030 non-chimeric ASVs, we removed 231 ASVs with  $\leq 10$  total sequences and another 81  
267 ASVs that were detected in only 1 sample with <30 sequences, to produce a final set of 718  
268 ASVs (Table S2). The ASVs were classified by taxon using a QIIME2 scikit-learn fitted  
269 classifier that had been trained on the SILVA database (release 128 QIIME) clustered at 97%  
270 similarity (Table S2).

271

## 272 *RNA extraction and processing for hybridization to the microarray*

273 Environmental RNA containing transcripts from *Prochlorococcus* cells was extracted  
274 using an Ambion RiboPure Bacteria kit (Ambion, Thermo Fisher), with modifications that

275 included mechanical lysis using glass beads (Biospec, Bartlesville, OK). The extracted RNA was  
276 treated with a Turbo-DNA-free DNase kit (Ambion, Thermo Fisher) to remove genomic DNA.  
277 Samples were collected for two experiments, for each one two technical replicates were collected  
278 at 3 different time points, same as DNA samples. Sufficient environmental RNA was obtained  
279 for two technical replicates in 4 samplings (4h\_1control, 4h\_2control, 4h\_1glucose,  
280 4h\_2glucose, 12h\_1glucose, 12h\_2glucose, 2D\_4h\_1glucose and 2D\_4h\_2glucose).

281 RNA concentration, purity and quality were determined using a NanoDrop 1000  
282 instrument (Thermo Scientific, Waltham, MA, USA), a 2100 Bioanalyzer (Agilent Technologies,  
283 Santa Clara, CA, USA), and an RNA 6000 Nano kit (Agilent Technologies). Only samples with  
284 RNA integrity values of  $>7.0$  and ratios of  $A_{260}/A_{230}$  and  $A_{260}/A_{280} \geq 1.8$  were processed further.  
285 Double-stranded cDNA (ds-cDNA) was synthesized from environmental RNA samples that  
286 contained *Prochlorococcus* and amplified following the procedure previously described by  
287 Shilova et al. (31). Briefly, 400 ng RNA from each sample was used, and 1  $\mu$ l of a 1:100 dilution  
288 (corresponding to 4.7 aM of ERCC-0016) of RNA spike-in mix 1 (External RNA Control  
289 Consortium (32) (Ambion)) was added before amplification was performed to monitor the  
290 technical performance of the assay showing linear amplification of specific probes (Fig. S2) (32).  
291 Double-stranded cDNA was synthesized and amplified using a TransPlex whole-transcriptome  
292 amplification kit (WTA-2; Sigma-Aldrich, St. Louis, MO, USA) and antibody-inactivated hot-  
293 start Taq DNA polymerase (Sigma-Aldrich). The amplified cDNA was purified with a GenElute  
294 PCR cleanup kit (Sigma-Aldrich), and concentration, purity and quality of ds-cDNA were  
295 determined using a NanoDrop 1000 instrument, a 2100 Bioanalyzer, and an Agilent DNA 7500  
296 kit (Agilent Technologies). Total RNA concentration of 400 ng yielded on average 12  $\mu$ g of ds-  
297 cDNA. The labeling and hybridization of cDNA samples (2.0  $\mu$ g of ds-cDNA) to the microarray

298 were done at the facility Centro de Investigación Príncipe Felipe (Valencia, Spain) according to  
299 the Agilent Technology protocol for arrays.

300

### 301 *Design of the Prochlorococcus array*

302 The *Prochlorococcus* oligonucleotide expression array was designed using  
303 *Prochlorococcus* genes and the eArray Web-based tool (Agilent Technology  
304 Inc.; <https://earray.chem.agilent.com/earray/>) similarly to the array design previously described  
305 by (31, 33). The gene sequences were obtained from the National Center of Biotechnology  
306 Information (NCBI; <https://www.ncbi.nlm.nih.gov>). Briefly, six probes of 60 nucleotides in  
307 length were designed for each gene, and a total of 7,501 probes (1,326 genes) were designed for  
308 *Prochlorococcus*. The probes were designed based on the sequenced genomes of the strains more  
309 abundant at Station ALOHA for specific core genes involved in carbon metabolism and  
310 photosynthesis pathways. These probes were replicated 4 times in the 8 × 60K array slides,  
311 which allowed internal evaluation of signals. The sequences of all oligonucleotide probes were  
312 tested *in silico* for possible cross-hybridization as described below. The probe sequences were  
313 used as queries in the BLASTN against the following available nt databases in June 2017:  
314 Marine microbes, Microbial Eukaryote Transcription, and Non-redundant Nucleotides NCBI  
315 SRA website and all rRNA databases from Silva as of February 2, 2016.

316 Agilent technology allows 5% nt mismatch in the whole probe region; thus, sequences  
317 with a range of 95% to 100% nt identity to the target probe are detected. Therefore, all probes  
318 with BLASTN hits with  $\geq 95\%$  over 100% of the nt length were deleted. Next, the probe  
319 sequences that passed the cross-hybridization filter were clustered using CD-HIT-EST (34, 35) at  
320 95% nt similarity to select unique probes for *Prochlorococcus*.

321 In addition, standard control probes (IS-62976-8-V2\_60Kby8\_GX\_EQC\_201000210  
322 with ERCC control probes added) were included randomly as part of the Agilent Technology  
323 array to feature locations on the microarray slide. The final design of the microarray was  
324 synthesized on a platforms of ca. 62,976 experimental probes and 1,319 control probes on each  
325  $8 \times 60K$  array slide. The probe sequences are available at NCBI Gene Expression Omnibus  
326 (GEO) under accession number GSE154594.

327

### 328 *Microarray data analysis*

329 All data analyses were performed with R ([www.R-project.org](http://www.R-project.org)) and packages from the  
330 Bioconductor Project (36), specifically, using the Biobase (37), Linear Models for Microarray  
331 LIMMA (38), arrayQualityMetrics (39) and affyPLM (40, 41). These packages were mainly  
332 utilized via software that was developed for the MicroTOOLS environmental microarray (31,  
333 42), which we adapted slightly to the *Prochlorococcus* microarrays. As in the prior study (42)  
334 arrays were normalized by quantiles and gene intensities were calculated by median polishing  
335 (Fig. S3). Gene detection was done separately for each gene in each sample. Specifically, each  
336 gene  $g$  was detected in each sample  $s$  if it had a signal to noise ratio  $SNR_{gs} \geq 5$ , where  $SNR_{gs} =$   
337  $S_{gi} / BG_s$  and  $BG_s$  was the background intensity in  $s$ . We defined  $BG_s$  based on the lowest  
338 detected ERCC mRNA spike-in transcripts. For each sample ERCC spike-in transcript intensities  
339 were linearly modeled (Fig. S2). Then we identified in  $s$  the least concentrated ERCC with a  
340 modelled intensity that was twice the median of measured intensities for Agilent negative control  
341 probes (structural hairpins).  $BG_s$  was the modelled intensity for this ERCC. On average 448  
342 genes (mean) were detected in each sample (min 416, max 538). In total, 775 detected genes  
343 were detected across the samples (union). Raw and normalized microarray data for

344 *Prochlorococcus* were submitted to NCBI GEO under accession number GSE154594.

345 As in the prior study (42), differentially expressed (DE) genes were identified using the  
346 LIMMA functions lmFit, eBayes, and topTreat. Empirical Bayes is well suited to studies with  
347 few samples because it pools them to estimate the variances for each gene's linear model (43).  
348 To identify biologically relevant DE, we looked for genes with fold changes that were at least  
349 1.3× different (not simply >0) between treatments and matched controls (Benjamini-Hochberg  
350 adjusted  $p$ -value < 0.05). DE genes always had changes >1.5-fold (mean 2.3-fold) and were  
351 mainly identified in the experiment 2 at 12h (2D\_12h\_glucose vs. 2D\_12h\_control). DE genes  
352 were required to be above detection cut offs in at least one of the treatment or control samples.

353 The Ensemble Gene Set Enrichment Analyses approach (EGSEA; (44)) was used to  
354 check for significant transcript level changes that occurred collectively for genes from the same  
355 pathway. Briefly, for each *Prochlorococcus* clade, genes were assigned to pathways based on the  
356 literature (with multiple pathway memberships allowed; Supplemental Information). Only genes  
357 for which transcripts tend to change in the same direction in a pathway (increasing or decreasing  
358 together) were included in our pathways.

359

## 360 **Results**

361 *Prochlorococcus* cell abundance and cell size

362 *Prochlorococcus* dominated phytoplankton abundances, with on average  $1.23 \pm 0.35 \times$   
363  $10^5$  cell ml<sup>-1</sup>, with *Synechococcus*, *Crocospaera* and picophytoeukaryotes contributing  $1.47 \pm$   
364  $0.39 \times 10^3$ ,  $3.77 \pm 0.97 \times 10^2$ ,  $8.32 \pm 1.92 \times 10^2$  cell ml<sup>-1</sup>, respectively (average  $\pm$  standard  
365 deviation,  $n = 20$  (biological and technical replicates; Fig. S4).



366 *Prochlorococcus* cell abundance and cell size showed a diel cycle with increasing cell  
367 abundance and cell diameter during the daylight period and lowest values during the dark period.  
368 Cell abundances varied from  $0.7 \times 10^5$  to  $1.8 \times 10^5$  cell  $\text{ml}^{-1}$ , while cell size varied from 0.36 to  
369  $0.41 \mu\text{m}$  (Fig. S5).

370

### 371 *Inorganic carbon fixation rates (primary production)*

372 Rates of inorganic carbon fixation by the whole community ( $> 0.2 \mu\text{m}$ , Fig. 1a, Table 1)  
373 ranged from  $0.8 \pm 0.0 \text{ nmol C l}^{-1} \text{ h}^{-1}$  at night (18:30 to 4:00 incubations) to  $28.6 \pm 0.8 \text{ nmol C l}^{-1}$   
374  $\text{h}^{-1}$  at noon (noon to 16:00 incubations). On average, carbon fixation during daylight was  $25.1 \pm$   
375  $3.1 \text{ nmol C l}^{-1} \text{ h}^{-1}$  ( $n=12$ ). On a per cell level, *Prochlorococcus* also showed a pronounced diel  
376 cycling in carbon fixation with undetectable values at night and  $13.1 \pm 8.5 \text{ nmol l}^{-1} \text{ h}^{-1}$  ( $1.22 \pm$   
377  $0.66 \text{ fg C cell}^{-1} \text{ h}^{-1}$ ) during the day ( $n = 12$ , Fig. 1b, Table 1). As a taxon specific group,  
378 *Prochlorococcus* represented  $41.5 \pm 16.5\%$  of the total carbon fixation during the day ( $34.8 \pm$   
379  $10\%$  in the morning and  $49.6 \pm 20\%$  in the afternoon ( $n = 11$ )).

380

### 381 *Glucose assimilation*

382 The two bioassays conducted using  $^3\text{H}$ -glucose during HOT 296 indicated an ambient  
383 glucose concentration of  $1.1 \pm 0.1 \text{ nmol l}^{-1}$ . The  $^3\text{H}$ -glucose spike added, on average, an  
384 additional  $1.9 \pm 0.2 \text{ nmol l}^{-1}$  ( $n=20$ ). Taking both the ambient and added glucose concentrations  
385 into account, the assimilation of glucose by the whole community ( $> 0.2 \mu\text{m}$ , Fig. 1c, Table 1)  
386 varied over the diel cycle by approximately a factor of 2 ( $14.5 \pm 0.1$  to  $30.4 \pm 0.3 \text{ pmol } ^3\text{H-Glc}$   
387  $\text{l}^{-1} \text{ h}^{-1}$ ), with on average  $24.0 \pm 5.6 \text{ pmol } ^3\text{H-Glc l}^{-1} \text{ h}^{-1}$  ( $n = 20$ ). A diel pattern was observed for  
388 the whole community with lower values in incubations started at dusk (18:00), averaging  $14.9 \pm$

389 0.5 pmol  $^3\text{H-Glc l}^{-1} \text{ h}^{-1}$  (n = 4) and higher values in incubations started at midnight and early  
390 morning averaging  $25.6 \pm 2.7$  pmol  $^3\text{H-Glc l}^{-1} \text{ h}^{-1}$  (n = 8) (Fig. 1c, Table 1).

391 However, *Prochlorococcus* showed a different diel pattern in glucose assimilation with  
392  $0.003 \pm 0.001$  amol Glc cell $^{-1} \text{ h}^{-1}$  at night (n = 8) and  $0.007 \pm 0.001$  amol Glc cell $^{-1} \text{ h}^{-1}$  during  
393 the day (n = 12, Table 2). Similarly, as a taxon specific group, *Prochlorococcus* presented a  
394 pronounced diel cycle with maximum values at noon of  $0.88 \pm 0.36$  pmol Glc  $\text{l}^{-1} \text{ h}^{-1}$  (n=6) and  
395 minimum values at midnight of  $0.39 \pm 0.05$  pmol Glc  $\text{l}^{-1} \text{ h}^{-1}$  (approximately 2.3-fold change) (n  
396 = 4, Fig. 1d, Table 1).

397 *Prochlorococcus* represented  $2.9 \pm 1.3\%$  of the glucose assimilation by the whole  
398 community (n = 20), with  $3.4 \pm 1.4\%$  during daylight (n = 12) and  $2.1 \pm 0.8\%$  during the night (n  
399 = 8) (Table 1). On average, the assimilation of carbon from glucose by the whole microbial  
400 community represented  $0.63 \pm 0.2\%$  of the carbon fixed by primary production. The assimilation  
401 of carbon from glucose by *Prochlorococcus* represented circa  $0.05 \pm 0.02\%$  of their carbon fixed  
402 by primary production (Table 1).

403 The ambient glucose concentration and the assimilation of glucose was initially measured  
404 using  $^{14}\text{C}$ -glucose as a potentially better tracker of the fate of carbon from glucose amendments.  
405 The ambient glucose concentration was  $0.9 \pm 0.1$  nmol  $\text{l}^{-1}$  (n=5) and  $0.5 \pm 0.2$  nmol  $\text{l}^{-1}$   
406 respectively using  $^{14}\text{C}$ -glucose during the HOT 295 and 298 cruises. Taking both the ambient  
407 and added glucose concentrations into account, the  $^{14}\text{C}$ -glucose assimilation by the whole  
408 community showed the same pattern as the  $^3\text{H}$ -glucose assimilation, although varied by  
409 approximately a factor of 2.6 (27.7 to 73.9 pmol  $^{14}\text{C-Glc l}^{-1} \text{ h}^{-1}$ ), with on average  $47.1 \pm 12.6$   
410 pmol Glc  $\text{l}^{-1} \text{ h}^{-1}$  (n = 20) (Table 1).

411           Due to the much lower specific activity of  $^{14}\text{C}$ -glucose compared to  $^3\text{H}$ -glucose, and the  
412 necessity to keep the glucose enrichments low at  $\sim 2$  nM in these experiments, the radioactivity  
413 in *Prochlorococcus* sorted cells was not significantly different than in blank samples, and  $^{14}\text{C}$ -  
414 glucose assimilation cannot be reported for *Prochlorococcus*.

415

416 *Glucose effect on the bacterial community composition: 16 S rRNA sequences*

417           We measured shifts in microbial community composition following glucose enrichment  
418 based on 16S rRNA gene tag sequencing. In all samples, the total and picoplankton communities  
419 were dominated by Alphaproteobacteria (mean 40% of total sequences in each sample vs. 3% for  
420 all other Proteobacteria combined), in particular the SAR11 clade, and cyanobacteria (38%),  
421 mainly *Prochlorococcus* (36%) (Fig. S6 and Supplementary Information). ASVs with unknown  
422 phylum were rare ( $<0.01\%$ ; Fig. S6). The remaining ASVs were mainly from Bacteroidetes  
423 (Flavobacteria), Actinobacteria (the OM-1 clade bacteria like *Candidatus Actinomarina*),  
424 Planctomycetes and Euryarchaeota (Fig. S6 and Supplementary Information).

425           There were no large shifts in the relative abundances of these taxa in response to glucose  
426 amendments over the 24 h incubation period based on NMDS and PERMANOVA analyses of  
427 Bray-Curtis distances between samples (Fig. S7; Supplementary Information). Thirty-three  
428 ASVs had significant ( $p<0.05$ ) abundance changes in response to glucose but they were rare  
429 community members in each sample ( $< 0.1\%$ ; Supplementary Information, Fig. S8 and Table S3).

430

431 *High- and low-light Prochlorococcus photosystem I and C fixation genes were highly*  
432 *transcribed*

433           The microarray targeted 1200 genes from the dominant *Prochlorococcus* strains at Station  
434 ALOHA (Table S4). On average, 41% (488 genes) were transcribed at detectable levels in each  
435 sample and 65% (775 genes) across all samples (Table S5). Thus, the population was  
436 transcriptionally active over the diverse set of metabolic pathways represented on the microarray  
437 (Table S4 and S5). Indeed, on average  $64 \pm 33\%$  ( $\pm$  standard deviation,  $n = xx$ ) of genes were  
438 detected for each of the 34 strains represented on the microarray (Table S6). Within each sample  
439 most transcripts belonged to high-light (HL) adapted ecotypes from unknown clades  
440 (HOT208\_60m\_813O14, HOT208\_60m\_813G15), followed by clades II (AS9606, MIT0604)  
441 and I (MIT9515, MED4; Fig. S9). Low-light (LL) strains were also detected in every sample  
442 primarily from clades I (PAC1, NATL1/2) and II/III (SS120, MIT0602), and less often from IV  
443 (MIT9313, MIT0303; Table S6). Generally, we observed higher number of detected genes and  
444 transcript levels for HL strains than for LL (Table S6, Fig. S10). The fraction of the transcription  
445 levels of the LLIV strains (Fig. 2) are likely overestimates because only 9–10% of LLIV genes on  
446 the microarray were detected (Table S6).

447           Across all ecotypes, photosystem I (PSI) and C fixation pathways were highly transcribed  
448 in both control (Fig. 2) and glucose treatments (not shown), and notably transcription was higher  
449 for HL I compared to other HL clades. In contrast, LL clade I had higher levels of transcription  
450 for PSI and respiration but lower levels for C fixation when compared with other LL members  
451 (Fig. 2).

452

#### 453 *Prochlorococcus* expression patterns upon glucose addition

454           *Prochlorococcus* metatranscriptomes clustered primarily by day or night and secondarily  
455 by the hour of the day, which suggests that overall gene expression was more influenced by diel

456 cycles than by glucose addition (Fig. S11). For most incubations, glucose treatments and matched  
457 controls had similar metatranscriptomes in the NMDS analysis. This suggests that if there were  
458 phase differences in diel expression between treatments and matched controls, despite mRNA  
459 having been fixed at approximately the same time, then the effects of the phase differences on  
460 metatranscriptomes were negligible. Moreover, the proportions of transcripts from each of the  
461 clades remained stable over the incubations from 4 to 24 h (Fig. S9). Therefore, any changes in  
462 the relative abundances of transcriptionally active HL and LL cells would also have had  
463 negligible effects on metatranscriptomes. Hence, we interpret differences in metatranscriptome  
464 positions in the NMDS between glucose treatments and matched controls as responses to glucose  
465 amendment. For the 4 h incubations that terminated in the night (20:00) or in day light (16:00),  
466 differences were small. We suspect that 4 h incubation was too short to observe a transcriptional  
467 response to glucose because larger metatranscriptome changes occurred for most of the  
468 incubations longer than 4 h. For example, metatranscriptome shifts were apparent in the NMDS  
469 for two of the three 12 h incubations that terminated at night (2D\_12h\_glucose and 12h\_1glucose)  
470 and for the 24 h incubation that terminated in day light (2D\_24h\_glucose) in comparison to 4 h  
471 incubations that terminated at the same hour (16:00) (Fig. S11). However, some of the longer  
472 incubations did not show responses to glucose (for example 12h\_2glucose and 24h\_1glucose).

473 A total of 174 genes were significantly differentially expressed (DE) in response to  
474 glucose (Table S7). Expression changes for the 174 DE genes always exceeded 1.5-fold (mean  
475 2.3-fold). Most DE genes (157 genes) were identified in the 12 h incubations that terminated in  
476 the dark at 4:00 (“2D\_12h” for 2D\_12h\_glucose vs. 2D\_12\_control). Although we did not have  
477 replicates for 2D\_12h, our DE tests borrowed information from all 15 microarrays to determine  
478 which genes had fold changes that were significant relative to their estimated gene variances (43,

479 45). HL *Prochlorococcus* had the majority of DE genes in 2D\_12h (145 of 157 genes; Table S7),  
480 often transcript level increased within pathways involved in glucose metabolism (Fig. 3a and  
481 Table S7). For example, increases occurred for respiration (*coxAB*, *cyoC*), the pentose phosphate  
482 pathway (*tal*, *rbsK*), the Entner-Dudoroff pathway (*gdh*), glycolysis (*pgi*), glucose transport  
483 (*glcH*), and the Krebs Cycle (*fumC*). Increases also occurred for circadian rhythm genes (*kaiB*).  
484 Several carbon fixation genes increased (*rbcS*) but most decreased (*prk*), as did several genes  
485 involved in glycolysis/gluconeogenesis (*cbbA*, *pykF*) and energy metabolism (*atpABC*) (Fig. 3a  
486 and Table S7). A gene set enrichment analysis corroborated the HL increases for respiration,  
487 pentose phosphate pathway, and glucose transporter genes and the decreases for glycolysis genes  
488 (Supplemental Information). For LL, the 12 DE genes identified in 2D\_12h included one *tal*  
489 (pentose phosphate) and one *coxA* (respiration) that decreased, whereas DE genes in these two  
490 pathways strictly increased for HL (Fig. 3b and Table S7).

491 Sample metatranscriptomes clustered mainly by time of the day in both NMDS analysis,  
492 which used most detected genes, and in an analysis that used only the 157 DE genes in 2D\_12h  
493 (Fig. S12). However, the 2D\_12h samples did not cluster together, rather glucose addition  
494 resulted in transcript levels similar to those in the 2D\_4h incubations (Fig. S12 [left]). This  
495 suggests that diel expression patterns were maintained for most incubations but were perturbed by  
496 glucose addition in 2D\_12h. We visualized the response in a heat map (Fig. 4). For HL  
497 *Prochlorococcus*, the sample clusters were distinguished by pathways (mentioned earlier) that  
498 responded to glucose: elevated transcript levels for respiration and pentose phosphate pathway  
499 (gene cluster 1) and sugar transporters and Entner-Dudoroff (gene cluster 4), and decreased  
500 transcript levels for C fixation and glycolysis (gene clusters 2 and 3, respectively). Intriguingly, 5  
501 *kaiB* genes were DE with increases from 2.1 to 5.7-fold, and all 5 of them (Circadian Rhythm

502 genes in cluster 1) had their highest observed levels (in any samples) in 2D\_12h\_glucose. This  
503 might indicate that a change in diel regulation drove the transcription of 2D\_12h\_glucose to be  
504 more similar to the 2D\_4h metatranscriptomes. LL *Prochlorococcus* had only 12 DE genes  
505 which mainly decreased in response to glucose amendment (in gene cluster 5, Fig. 4).

506 Most of the 19 DE genes identified in the 24 h incubations that terminated in the light at  
507 12:00 (24h\_glucose vs. 24h\_control) were from pathways related to glucose metabolism (Fig.  
508 3 c,d and Table S7). For HL, increases occurred for respiration (*coxC*), the pentose phosphate  
509 pathway (*opcA*), and pyruvate metabolism (*pdhB*), as well as for cell division (*minD*) (Fig. 3 c  
510 and Table S7). The respiration increases were corroborated by the gene set enrichment analysis  
511 (Supplemental Information). Few genes were DE for LL but they included *coxA*, which  
512 decreased, in contrast to strict increases for HL respiration genes (also in 2D\_12h) (Fig. 3d and  
513 Table S7).

514 Only 1 DE gene was identified in the 4h incubations that terminated in the dark at 20:00  
515 (2D\_4h\_glucose vs. 2D\_4h\_control), pyruvate dehydrogenase (*pdhA*) from the LLI strain  
516 NATL2, which decreased in the presence of glucose (Table S7).

517

## 518 Discussion

### 519 *Prochlorococcus* metabolism

520 *Prochlorococcus* abundances and cell size showed a clear diel cycle with increase in  
521 during the day and decrease during the latter half of the night as described in previous works (46,  
522 47) (Fig. S5).

523 As expected, natural *Prochlorococcus* populations showed a pronounced diel cycle in  
524 carbon fixation, with undetectable values at night and  $13.1 \pm 8.5 \text{ nmol C l}^{-1} \text{ h}^{-1}$  (or  $1.22 \pm 0.66 \text{ fg}$

525 C cell<sup>-1</sup> h<sup>-1</sup>) fixed between noon and 16:00 (Fig. 1b, Table 2). Similar cell rates of carbon  
526 fixation by *Prochlorococcus* have been measured in the upper euphotic zone at Station ALOHA  
527 and in the Atlantic Ocean (3, 4, 8, 48-50) (Table 2).

528 Ambient glucose concentrations were in the nanomolar range, with averaged values of  
529  $1.1 \pm 0.1$  nmol l<sup>-1</sup> (n = 4), similar to concentrations previously reported (11, 14, 20).  
530 Furthermore, the relative contribution of *Prochlorococcus* to total glucose assimilation was  
531 approximately  $3.4 \pm 1.4$  % of the total glucose assimilation observed at Station ALOHA, very  
532 similar to previous reports from the North Atlantic Ocean (2.6–3.7%) (14) and the Western  
533 tropical South Pacific Ocean (~5%) (11). Based on the results obtained here, the glucose  
534 assimilation by *Prochlorococcus* represented a small fraction (< 1%) of total (inorganic +  
535 organic) C assimilation, similar to values previously reported (11, 14) (Table 1). It is worth  
536 noting that, in a previous study carried out in the Atlantic Ocean (14), the percentage of total  
537 glucose assimilation assigned to *Prochlorococcus* was overestimated due to errors in the  
538 calculation. The corrected data for glucose assimilation comparing the total C was also lower  
539 than 1%. Nevertheless, this percent could be underestimated if glucose is being used for energy  
540 rather than for biosynthesis, which would push the total amount of assimilated C from glucose  
541 above that determined from new biomass. Furthermore, glucose is one of the diverse dissolved  
542 organic C molecules pool present in the ocean (51, 52) that *Prochlorococcus* might be able to  
543 use (14, 53), which could make this percent much higher if we take into account all potential  
544 organic substrates.

545 It should be noted that the high affinity GlcH glucose transporter identified in  
546 *Prochlorococcus* is multiphasic, showing different K<sub>s</sub> constants depending on the glucose  
547 concentration. (14). Therefore, if higher glucose concentrations become available in the ocean



548 for whatever reason (54, 55), the transporter could work at higher glucose assimilation rates, and  
549 this could lead to a significant contribution of organic carbon assimilation by *Prochlorococcus*.

550 The total C assimilation by *Prochlorococcus* was determined comparing different tracers  
551 ( $^3\text{H}$ -glucose versus  $^{14}\text{C}$ -sodium bicarbonate) since results obtained with  $^{14}\text{C}$ -glucose samples  
552 subjected to cell sorting were below detection limits. This could lead to underestimation of the C  
553 fraction assimilated from glucose due to a possible loss of  $^3\text{H}$  in exchange reactions with  $\text{H}_2\text{O}$ , or  
554 to the fact that assimilated  $^3\text{H}$  can create problems of self-absorption (56, 57).

555 An interesting aspect of our results was the fact that *Prochlorococcus* showed a clear diel  
556 pattern in glucose assimilation with maximum values during the day (approximately 3-fold  
557 change) (Fig. 1d, Table 2). However, a contrasting diel pattern was observed for the whole  
558 community with higher values from midnight to early morning and low values at sunset  
559 (approximately 2-fold change).

560 Previous studies, carried out in the Pacific and Atlantic Oceans, showed similar per cell rates in  
561 daylight incubations (11, 14). Light stimulates the cyanobacterial assimilation of amino acid (8,  
562 11, 58-61), DMSP (62, 63) and ATP (11, 60, 64); this has also been observed for the assimilation  
563 of glucose in natural populations of *Prochlorococcus* (11), where it is an active process (13, 15).  
564 However, this is the first study showing that glucose assimilation in natural *Prochlorococcus*  
565 populations follows a diel pattern. The fact that *Prochlorococcus* glucose assimilation rates peak  
566 during the light period while rates in the whole community peak during the night-early morning,  
567 could provide *Prochlorococcus* some advantages over the rest of the community. One of the  
568 advantages is the coupling of the energy produced by photosynthesis to the glucose assimilation,  
569 since it is actively transported (15). Coupling the light availability with cellular processes would  
570 facilitate adaptation to daily environmental changes (65). *Prochlorococcus* could thus be using

571 some of the sugars that are lost by other microorganisms death and sloppy feeding by  
572 zooplankton during the day or other mortality (coevolved mutualism (66)). The fact that  
573 *Prochlorococcus* showed a different timing of glucose assimilation compared to the total  
574 population may also offer considerable fitness advantages over the competitors in “temporal  
575 niches” (67).

576 A similar difference in assimilation timing seems to exist for amino acids assimilation: in  
577 *Prochlorococcus* populations of the Atlantic Ocean, the maximum happens during the dark  
578 period (68); however, in heterotrophic bacteria studied in the Mediterranean sea, maximum  
579 leucine assimilation occurs around noon (69). In this regard, it would be worth investigating  
580 whether the assimilation of other organic compounds, such as ATP or DMSP, are also subjected  
581 to differential circadian rhythms in marine picocyanobacteria vs the total microbial community,  
582 which could be relevant in ecological terms.

583 Interestingly, previous studies on the diel rhythmicity of amino acid assimilation by  
584 *Prochlorococcus* in surface areas of the Atlantic Ocean showed maximal assimilation values at  
585 the beginning of the dark period, and minimal values around midday (68); this is almost exactly  
586 the opposite rhythm that we found for glucose assimilation in the same organism. This contrast is  
587 striking, especially if we consider that both amino acid and glucose assimilations are active  
588 processes, stimulated by light. A possible explanation for the difference might be based on the  
589 fact that amino acids are an important source for N in oligotrophic environments; since N is an  
590 essential element for the production of many cell compounds required before division, a  
591 maximum of amino acid assimilation at the beginning of the dark period might boost protein  
592 synthesis prior to *Prochlorococcus* cell division, as proposed by Mary and coworkers (68). By  
593 contrast, glucose can be directly used for general metabolic needs in *Prochlorococcus* (13), and

594 therefore it would be more efficient to take up most glucose at midday, coupling the energy  
595 consumed by this process to the light photosynthetic reactions. Regardless of the difference of  
596 rhythms between glucose and amino acid assimilation in *Prochlorococcus*, the results show that  
597 not all light-stimulated assimilation processes are regulated the same way in marine  
598 picocyanobacteria.

599 Cell specific glucose assimilation by *Synechococcus* was previously determined in the  
600 Western tropical South Pacific Ocean and was similar to that of *Prochlorococcus* (0.006 amol  
601 Glc cell<sup>-1</sup> h<sup>-1</sup>), likely attributable to *Synechococcus* larger biovolume (11) (Table 2). In the  
602 present study, the *Synechococcus* population was also sorted after <sup>3</sup>H-Glucose incubation but due  
603 to the low *Synechococcus* abundances at Station ALOHA (approximately 100-fold lower cell  
604 concentration than *Prochlorococcus*), results were not significantly different than the blanks.  
605 Still, it is possible that *Prochlorococcus* and *Synechococcus* compete for glucose. Experiments  
606 performed in laboratory cultures revealed that glucose transport in *Prochlorococcus* and  
607 *Synechococcus* displays multiphasic kinetic with high efficiency (calculated by dividing the  
608 assimilation rate by the K<sub>s</sub> constant, between 0.01–20 μmol l<sup>-1</sup>) (15). A comparison of the  
609 assimilation efficiency demonstrated *Prochlorococcus* to be 7 times more efficient than  
610 *Synechococcus* (15), which could be an advantage for *Prochlorococcus* in oligotrophic areas  
611 where they coexist with *Synechococcus*, such as Station ALOHA.

612

### 613 *Effects of glucose enrichment*

614 As anticipated from previous studies, the SAR11 clade (Proteobacteria) and  
615 *Prochlorococcus* were highly abundant in all samples at station ALOHA, followed by  
616 Bacteroidetes and Actinobacteria (70, 71).

617 Our results did not show differences in community composition after glucose enrichment  
618 (Fig. S6 and S7). It is possible that the incubation times were too short to see changes in the  
619 microbial community, or that the glucose concentration was too low to induce changes in the  
620 studied time. Higher abundance of *Prochlorococcus* upon addition of glucose and mannitol was  
621 observed in oligotrophic areas of the South Pacific (53); however, the authors used a 4,000-fold  
622 higher glucose concentration and longer incubation times than we did (0.4 mM and 78 h  
623 maximum vs 0.1  $\mu$ M and 24 h maximum used in our study).

624 The population was transcriptionally active over the diverse metabolic pathways of the 34  
625 strains identified. Many of the same *Prochlorococcus* strains detected in our results, were  
626 detected in previous studies also using Agilent microarrays at Station ALOHA (31).  
627 Furthermore, in both studies, photosynthesis and carbon fixation genes have been the most  
628 highly transcribed across all taxa and samples (this study and (31)).

629 Generally, we observed higher percentages of detected genes and higher transcript levels  
630 for HL strains than for LL (Table S6 and Fig. S10). Previous study at Station ALOHA also found  
631 much smaller proportions of LL clade transcripts relative to HL clades of *Prochlorococcus* at the  
632 surface (72). Our results might suggest that either HL strains had higher relative cell abundances  
633 (since samples were collected from the surface in our work) or were transcriptionally more active  
634 (73, 74), or both. However, if HL strains were transcriptionally more active than LL strains, we  
635 would expect even greater differences between the transcript abundances in each of the clades,  
636 since we are sampling at the surface where HL is more abundant (75-78).

637 Moreover, we found differences in the transcripts across the clades of HL and LL  
638 ecotypes, with high transcription level in PSI and C fixation pathways in HLI and LLI clades. As  
639 discussed above, these values might be related to the cell abundances of these clades, in fact a

640 relatively high contribution of *Prochlorococcus* HLI and LLI in this North Pacific region has  
641 been observed previously in surface waters (77, 79-81). LLI strains are usually restricted to  
642 deeper depths at Station ALOHA when the water column is stratified, however contrary to other  
643 clades, LLI strains are present in the euphotic zone in mixed water (77).

644 *Prochlorococcus* strains showed the majority of the transcriptional changes after 12 h and  
645 24 h after glucose enrichment (Fig. 3). Moreover, only one gene responded significantly in a 4h  
646 incubation (*pdhA* from NATL2 in experiment 2), which suggests that in most cases  
647 *Prochlorococcus* might require between 12 and 24 h from the moment that glucose is taken up  
648 until the transcriptional response for the glucose metabolism is detectable. Moreover, the surface  
649 light flux in the second experiment averaged  $42.1 \text{ E m}^{-2} \text{ d}^{-1}$  versus  $33 \text{ E m}^{-2} \text{ d}^{-1}$  during the first  
650 experiment (Table S1), which could explain most changes observed during the second  
651 experiment, where higher light could have stimulated the glucose assimilation.

652 A total of 173 genes were significantly DE in response to glucose after 12 h or 24 h  
653 incubations (Fig. 3 and Table S7). The effect of glucose enrichment on the transcriptome of HL  
654 strains showed increases for respiration (*coxAB*, *cyoC*), the pentose phosphate pathway (*tal*,  
655 *rbsK*), the Entner-Dudoroff pathway (*gdh*), glycolysis (*pgi*), glucose transport (*glcH*), the Krebs  
656 Cycle (*fumC*), pyruvate metabolism (*pdhB*) and cell division (*minD*). The largest transcriptional  
657 changes occurred after 12 h incubation in the genes encoding the glucose transporter (*glcH*) with  
658 almost 8-fold increase, small RUBISCO subunit (*rbcS*) with 6.4-fold increase and the glucose 6-  
659 phosphate isomerase (*pgi*) involved in glycolysis with 5.5-fold increase (Table S7 and Fig. 3).  
660 Furthermore, a gene set enrichment analysis corroborated the HL increases for respiration,  
661 pentose phosphate pathway, and glucose transporter genes and the decreases for other glycolysis  
662 genes (Supplemental Information).

663 It has been proposed that *Prochlorococcus* might use two pathways to metabolize  
664 glucose, the Entner-Dudoroff and the pentose phosphate pathways (12, 13, 15, 82) and small  
665 changes in gene expression and quantitative proteomics have been demonstrated upon glucose  
666 addition (13, 15). Our results show, for the first time in natural samples, that *Prochlorococcus*  
667 could utilize glucose by both pathways. Changes in the expression of one glycolytic enzyme  
668 (phosphoglucose isomerase, *pgi*) was also observed, as previously reported (15). Glycolysis is  
669 not active since *Prochlorococcus* lacks phosphofructokinase (82). However, even if it lacks the  
670 enzymes involved in the initial steps of glycolysis, this cyanobacterium still has a few genes  
671 which could be involved in glucose assimilation with the production of reducing equivalents  
672 and/or the production of ATP as a result of the metabolization of glyceraldehyde 3-phosphate  
673 and phosphoenolpyruvate (13, 82).

674 Periodicities of the transcripts of genes involved in physiological processes such as  
675 carbon fixation, energy metabolism, photosynthesis, respiration, pentose phosphate, cell division,  
676 and amino acid metabolism tracked the timing of its activities relative to the light-dark cycle, as  
677 previously described (83). We observed high *glcH* transcription levels during the night at 20:00  
678 but mostly at 4:00 with the maximum transcript level (~8-fold change) (Supplemental  
679 Information and Table S7). The highest transcriptional changes of *glcH* during the night could  
680 indicate the synthesis of the glucose transporter in order to be ready during the day, when light is  
681 stimulating the assimilation according to the diel pattern in glucose assimilation.

682 An interesting result for HL strains was that glucose addition led to transcript level  
683 increases for the circadian gene *kaiB* (2.1-5.7-fold) 12 hours later at 04:00. A hypothesis is that  
684 glucose addition affects diel expression patterns. Zinser and coworkers previously described diel  
685 cycles for the HL strain MED4 in culture (83). A qualitative comparison to that work indicated

686 that some of the changes we observed were similar but found earlier in the diel cycle than those  
687 described by Zinser. Diel shifts were supported by our DE and gene set enrichment analyses  
688 (usually both) for multiple pathways. The transcript levels of Photosystem I and energy  
689 metabolism (ATP synthases) genes decreased, and respiration (*coxAB*) and the pentose  
690 phosphate pathway (*tal*) genes increased, consistent with MED4 diel expression changes from  
691 midnight to sunrise. Although we did not observe *rbcL* decreases as would be expected with a  
692 shift to earlier in the cycle, we saw clear decreases from phosphoribulokinase (*prk*), another  
693 enzyme in the Calvin-Benson Cycle. Curiously, we would have expected *kaiB* to decrease but  
694 observed the opposite. However, a close look at Zinser et al. shows some variability in *kaiB*  
695 levels as they increased to a sunrise peak. Therefore, in comparing the work of Zinser and  
696 coworkers on diel patterns for *Prochlorococcus* sp. MED4 with our work, we speculate that  
697 glucose addition might have delayed the diel expression patterns in the natural *Prochlorococcus*  
698 population studied.

699 Several studies have shown that circadian clocks are connected to cyanobacterial  
700 metabolism (84-86). Moreover, it has been found that in the presence of sugars the circadian  
701 clock acts as a dynamic homeostat responding to the carbohydrate signals (87) and, in other  
702 cyanobacteria, blocking the clock-resetting effect of a dark pulse (85). Our results suggest that  
703 glucose assimilation affects the circadian transcriptional machinery in *Prochlorococcus*, in good  
704 agreement with the studies cited above. The sudden availability of glucose could be an important  
705 event for the metabolism of *Prochlorococcus*, especially under conditions of darkness or very  
706 low light (88-90), justifying a change in the response to light rhythms.

707 Finally, we observed differences in the transcription profile between the different  
708 ecotypes. Few genes were DE in LL *Prochlorococcus* strains, but those that were showed

709 different patterns after glucose addition compared to HL strains. In fact, the LL ecotype was  
710 clustered in the heat map as an independent gene group (gene cluster 5). Genes from LL clades  
711 involved in pentose phosphate and respiration decreased after glucose addition, whereas genes in  
712 the same pathways increased in HL strains after 12 and 24 h of glucose addition (Fig. 3b,d).  
713 Other studies have also found that coexisting *Prochlorococcus* populations respond differently  
714 upon nutrients addition (91). Subpopulations with different abilities to utilize glucose even at the  
715 same depth could be explained by many factors like competition, environmental conditions or  
716 genetics. In fact, there is a diversity of kinetics in glucose assimilation in the *Prochlorococcus*  
717 strains (15), which could suggest that the glucose assimilation has been subjected to  
718 diversification along the *Prochlorococcus* evolution.

719 Overall, our results indicated that *Prochlorococcus* shows synchronous timing in gene  
720 expression and in glucose assimilation presumably coupled to the light cycle. Diurnal glucose  
721 assimilation allows *Prochlorococcus* to optimize glucose assimilation by using ATP made  
722 during the light period, coupling this process to photosynthesis. Furthermore, it also could  
723 provide some advantages over the rest of the community, which showed a different timing for  
724 glucose assimilation. This hypothesis might be related to the possible glucose-induced delay in  
725 the transcriptional rhythms suggested by some of our results.

726 The relative contribution of the different metabolic pathways to metabolize glucose in  
727 different subpopulations of *Prochlorococcus* should be further investigated to understand the  
728 impact of mixotrophy on the marine cyanobacterial populations and their consequences for  
729 global biogeochemical cycles.

730

731



732 **Declarations**

733 *Acknowledgments and funding*

734 We are grateful to the captain and crew of the R/V Kilo Moana for their essential support.

735 M.C.M.-M. was supported by a Marie Curie International Outgoing Fellowship within the 7th

736 European Community Framework Programme (FP7-PIOF-GA-2013-625188). S.D. was funded by the

737 National Science Foundation (OCE-1434916). K.B. and D.M.K. were funded by support of the

738 Simons Foundation (SCOPE award 721252) and the National Science Foundation (OCE-1756517;

739 A.E. White, PI). M.C. M.-M, J.D. and J.M. G.-F. were funded by the Spanish Ministry of Economy

740 and Competitiveness (BFU 2016-76227-P).

741

742 *Availability of data and material*

743 Microarray data have been deposited at NCBI Gene Expression Omnibus (GEO) under accession

744 number GSE154594. The 16S raw sequences have been deposited at Sequence Read Archive (SRA)

745 with the BioProject ID PRJNA758505.

746

747 *Authors' contributions*

748 M.C.M.-M. and S.D. designed the study. M.C.M.-M. sampled, designed and performed the molecular

749 approaches (transcriptomic and metagenomic analysis) and J.M analyzed the 16 S and transcriptomic

750 data and performed the corresponding figures. S.D. and K.B. sampled, designed and performed the

751 radioassays (cell-specific and bulk, respectively) and analyzed the data. M.M.M., S.D., K.B., J.M.,

752 J.D., D.K., and J.M.G.-F. drafted and edited the manuscript and figures. All authors read and approved

753 the final manuscript.

754

755 *Competing financial interests*

756 The authors declare no competing financial interests.

757

758

## 759 **References**

- 760 1. Rii YM, Duhamel S, Bidigare RR, Karl DM, Repeta DJ, Church MJ. Diversity and  
761 productivity of photosynthetic picoeukaryotes in biogeochemically distinct regions of the South  
762 East Pacific Ocean. *Limnol Oceanogr.* 2016;61(3):806-24.
- 763 2. Rii YM, Karl DM, Church MJ. Temporal and vertical variability in picophytoplankton  
764 primary productivity in the North Pacific Subtropical Gyre. *Mar Ecol Prog Ser.* 2016;562:1-18.
- 765 3. Duhamel S, Kim E, Sprung B, Anderson OR. Small pigmented eukaryotes play a major  
766 role in carbon cycling in the P-depleted western subtropical North Atlantic, which may be  
767 supported by mixotrophy. *Limnol Oceanogr.* 2019;64:2424-40.
- 768 4. Jardillier L, Zubkov MV, Pearman J, Scanlan DJ. Significant CO<sub>2</sub> fixation by small  
769 prymnesiophytes in the subtropical and tropical northeast Atlantic Ocean. *ISME J.*  
770 2010;4(9):1180-92.
- 771 5. Chisholm SW, Olson RJ, Zettler ER, Goericke R, Waterbury JB, Welschmeyer NA. A  
772 novel free living prochlorophyte abundant in the oceanic euphotic zone. *Nature.* 1988;334:340-3.
- 773 6. Sánchez-Baracaldo P, Bianchini G, Wilson JD, Knoll AH. Cyanobacteria and  
774 biogeochemical cycles through Earth history. *Trends Microbiol.* 2021.
- 775 7. Zubkov M, Fuchs B, Tarran G, Burkill P, Amann R. High rate of uptake of organic  
776 nitrogen compounds by *Prochlorococcus* cyanobacteria as a key to their dominance in  
777 oligotrophic oceanic waters. *Appl Environ Microbiol.* 2003;69(2):1299-304.
- 778 8. Björkman KM, Church MJ, Doggett JK, Karl DM. Differential assimilation of inorganic  
779 carbon and leucine by *Prochlorococcus* in the oligotrophic North Pacific subtropical gyre. *Front*  
780 *Microbiol.* 2015;6:1401.
- 781 9. Vila-Costa M, Simo R, Harada H, Gasol J, Slezak D, Kiene R.  
782 Dimethylsulfoniopropionate uptake by marine phytoplankton. *Science.* 2006;314(5799):652-4.
- 783 10. Feingersch R, Philosof A, Mejuch T, Glaser F, Alalouf O, Shoham Y, et al. Potential for  
784 phosphite and phosphonate utilization by *Prochlorococcus*. *ISME J.* 2011;6:827-34.
- 785 11. Duhamel S, Van Wambeke F, Lefevre D, Benavides M, Bonnet S. Mixotrophic  
786 metabolism by natural communities of unicellular cyanobacteria in the western tropical South  
787 Pacific Ocean. *Environ Microbiol.* 2018;20(8):2743-56.
- 788 12. Muñoz-Marín MC, Gómez-Baena G, López-Lozano FA, Moreno-Cabezuelo JA, Díez J,  
789 García-Fernández JM. Mixotrophy in marine picocyanobacteria: utilization of organic  
790 compounds by *Prochlorococcus* and *Synechococcus*. *ISME J.* 2020;14:1065-73.
- 791 13. Gómez-Baena G, López-Lozano A, Gil-Martínez J, Lucena J, Díez J, Candau P, et al.  
792 Glucose uptake and its effect on gene expression in *Prochlorococcus*. *PLOS One.*  
793 2008;3(10):e3416.

- 794 14. Muñoz-Marín MC, Luque I, Zubkov MV, Hill PG, Díez J, García-Fernández JM.  
795 *Prochlorococcus* can use the Pro1404 transporter to take up glucose at nanomolar concentrations  
796 in the Atlantic Ocean. *Proc Natl Acad Sci USA*. 2013;110(21):8597-602.
- 797 15. Muñoz-Marín MC, Gómez-Baena G, Díez J, Beynon RJ, González-Ballester D, Zubkov  
798 MV, et al. Glucose uptake in *Prochlorococcus*: diversity of kinetics and effects on the  
799 metabolism. *Front Microbiol*. 2017;8:327.
- 800 16. Moreno-Cabezuelo JA, López-Lozano A, Díez J, García-Fernández JM. Differential  
801 expression of the glucose transporter gene *glcH* in response to glucose and light in marine  
802 picocyanobacteria. *PeerJ*. 2019;6:e6248.
- 803 17. Wright RR, Hobbie JE. Use of Glucose and Acetate by Bacteria and Algae in Aquatic  
804 Ecosystems. *Ecology*. 1966;47(3):447-64.
- 805 18. Laws EA. Plots of turnover times versus added substrate concentrations provide only  
806 upper bounds to in situ substrate concentrations. *J Theor Biol*. 1983;101(147-150).
- 807 19. Zubkov M, Tarran G. Amino acid uptake of *Prochlorococcus* spp. in surface waters  
808 across the South Atlantic Subtropical Front. *Aquat Microb Ecol*. 2005;40(3):241-9.
- 809 20. Zubkov M, Tarran G, Mary I, Fuchs B. Differential microbial uptake of dissolved amino  
810 acids and amino sugars in surface waters of the Atlantic Ocean. *J Plankton Res*. 2008;30:211-20.
- 811 21. Steemann Nielsen E. The use of radioactive carbon ( $^{14}\text{C}$ ) for measuring organic  
812 production in the sea. *ICES J Mar Sci*. 1952;18:117-40.
- 813 22. Bock N, Van Wambeke F, Dion M, Duhamel S. Microbial community structure in the  
814 western tropical South Pacific. *Biogeosciences*. 2018;15(12):3909-25.
- 815 23. Moisaner PH, Beinart RA, Voss M, Zehr JP. Diversity and abundance of diazotrophic  
816 microorganisms in the South China Sea during intermonsoon. *ISME J*. 2008;2(9):954-67.
- 817 24. Klindworth A, Pruesse E, Schweer T, Peplies J, Quast C, Horn M, et al. Evaluation of  
818 general 16S ribosomal RNA gene PCR primers for classical and next-generation sequencing-  
819 based diversity studies. *Nucleic Acids Res*. 2013;41(1).
- 820 25. Amplicon PCRCu, P.C.R & Index, P.C.R. 16S Metagenomic Sequencing Library  
821 Preparation 2013 [Available from: [https://www.illumina.com/content/dam/illumina-](https://www.illumina.com/content/dam/illumina-support/documents/documentation/chemistry_documentation/16s/16s-metagenomic-library-prep-guide-15044223-b.pdf)  
822 [support/documents/documentation/chemistry\\_documentation/16s/16s-metagenomic-library-prep-](https://www.illumina.com/content/dam/illumina-support/documents/documentation/chemistry_documentation/16s/16s-metagenomic-library-prep-guide-15044223-b.pdf)  
823 [guide-15044223-b.pdf](https://www.illumina.com/content/dam/illumina-support/documents/documentation/chemistry_documentation/16s/16s-metagenomic-library-prep-guide-15044223-b.pdf)
- 824 26. Andrews S. FastQC: a quality control tool for high throughput sequence data 2010  
825 [Available from: <http://www.bioinformatics.babraham.ac.uk/projects/fastqc>.
- 826 27. Caporaso JG, Kuczynski J, Stombaugh J, Bittinger K, Bushman FD, Costello EK, et al.  
827 QIIME allows analysis of high-throughput community sequencing data. *Nat Methods*.  
828 2010;7(5):335-6.
- 829 28. Callahan BJ, McMurdie PJ, Rosen MJ, Han AW, Johnson A, Holmes SP. DADA2: High-  
830 resolution sample inference from Illumina amplicon data. *Nat Methods*. 2016;13:581-3.
- 831 29. Rognes T, Flouri T, Nichols B, Quince C, Mahe F. VSEARCH: a versatile open source  
832 tool for metagenomics *PeerJ*. 2016;4(e2584).
- 833 30. Edgar RC. UCHIME2: improved chimera prediction for amplicon sequencing. Preprint:  
834 bioRxiv 074252. 2016.
- 835 31. Shilova IN, Robidart JC, James Tripp H, Turk-Kubo K, Wawrik B, Post AF, et al. A  
836 microarray for assessing transcription from pelagic marine microbial taxa. *ISME J*.  
837 2014;8(7):1476-91.
- 838 32. Baker SC, Bauer SR, Beyer RP, Brenton JD, Bromley B, Burrill J, et al. The external  
839 RNA controls consortium: a progress report. *Nat Methods*. 2005;2(10):731-4.

- 840 33. Muñoz-Marín MC, Shilova IN, Shi T, Farnelid H, Cabello AM, Zehr JP. A  
841 transcriptional cycle suited to daytime N<sub>2</sub> fixation in the unicellular cyanobacterium *Candidatus*  
842 *Atelocyanobacterium thalassa* (UCYN-A). *mBio*. 2019.
- 843 34. Li WZ, Godzik A. Cd-hit: a fast program for clustering and comparing large sets of  
844 protein or nucleotide sequences. *Bioinformatics*. 2006;22(13):1658-9.
- 845 35. Huang Y, Niu BF, Gao Y, Fu LM, Li WZ. CD-HIT Suite: a web server for clustering and  
846 comparing biological sequences. *Bioinformatics*. 2010;26(5):680-2.
- 847 36. Gentleman R, Carey V, Bates D, Bolstad B, Dettling M, Dudoit S, et al. Bioconductor:  
848 open software development for computational biology and bioinformatics. *Genome Biol*.  
849 2004;5(10):R80.
- 850 37. Huber W, Carey VJ, Gentleman R, Anders S, Carlson M, Carvalho BS, et al.  
851 Orchestrating high-throughput genomic analysis with Bioconductor. *Nat Methods*.  
852 2015;12(2):115-21.
- 853 38. Smyth GK. Limma: linear models for microarray data. In: Carey R, Dudoits, V., Irizarry,  
854 R., Huber, W., editor. *Bioinformatics and computational biology solutions using R and*  
855 *Bioconductor*. New York: Springer; 2005. p. 397-420.
- 856 39. Kauffmann A, Gentleman R, Huber W. arrayQualityMetrics—a bioconductor package  
857 for quality assessment of microarray data. *Bioinformatics*. 2009;25:415-6.
- 858 40. Bolstad BM, Collin F, Brettschneider J, Simpson K, Cope L, Irizarry RA, et al. Quality  
859 assessment of Affymetrix GeneChip data. In: Gentleman R, Carey, V., Dudoit, S., Irizarry, R.,  
860 Huber, W., editor. *Bioinformatics and computational biology solutions using R and*  
861 *Bioconductor*. New York: Springer; 2005. p. 33-47.
- 862 41. Bolstad BM. Low-level Analysis of High-density Oligonucleotide Array Data:  
863 Background, Normalization and Summarization. Ph.D. dissertation.: University of California,  
864 Berkeley; 2004.
- 865 42. Robidart JC, Magasin JD, Shilova IN, Turk-Kubo KA, Wilson ST, Karl DM, et al.  
866 Effects of nutrient enrichment on surface microbial community gene expression in the oligotrophic  
867 North Pacific Subtropical Gyre. *ISME J*. 2019;13:374-87.
- 868 43. Smyth GK. Linear models and empirical bayes methods for assessing differential  
869 expression in microarray experiments. *Stat Appl Genet Mol Biol*. 2004;3:Article3.
- 870 44. Alhamdoosh M, Ng M, Wilson NJ, Sheridan JM, Huynh H, Wilson MJ, et al. Combining  
871 multiple tools outperforms individual methods in gene set enrichment analyses. *Bioinformatics*.  
872 2017;33(3):141-424.
- 873 45. McCarthy DJ, Smyth GK. Testing significance relative to a fold-change threshold is a  
874 TREAT. *Bioinformatics*. 2009;25(6):765-71.
- 875 46. Ribalet F, Swalwell J, Clayton S, Jimenez V, Sudek S, Lin Y, et al. Light-driven  
876 synchrony of *Prochlorococcus* growth and mortality in the subtropical Pacific gyre. *Proc Natl*  
877 *Acad Sci USA*. 2015;112(26):8008-12.
- 878 47. Worden A, Binder B. Application of dilution experiments for measuring growth and  
879 mortality rates among *Prochlorococcus* and *Synechococcus* populations in oligotrophic  
880 environments. *Aquat Microb Ecol*. 2003;30:159-74.
- 881 48. Viviani DA, Karl DM, Church MJ. Variability in photosynthetic production of dissolved  
882 and particulate organic carbon in the North Pacific Subtropical Gyre. *Front Mar Sci*. 2016;2:73.
- 883 49. Hartmann M, Gomez-Pereira P, Grob C, Ostrowski M, Scanlan DJ, Zubkov MV.  
884 Efficient CO<sub>2</sub> fixation by surface *Prochlorococcus* in the Atlantic Ocean. *ISME J*.  
885 2014;8(11):2280-9.

- 886 50. Li W. Primary production of prochlorophytes, cyanobacteria, and eukaryotic  
887 ultraphytoplankton - Measurements from flow cytometric sorting. *Limnol Oceanogr.*  
888 1994;39(1):169-75.
- 889 51. Moran MA, Kujawinski EB, Stubbins. Deciphering ocean carbon in a changing world.  
890 *Proc Natl Acad Sci USA.* 2016;113:3143-51.
- 891 52. Becker S, Tebben J, Coffinet S, Wiltshire K, Iversen MH, Harder T, et al. Laminarin is a  
892 major molecule in the marine carbon cycle. *Proc Natl Acad Sci USA.* 2020;117(12):6599-607.
- 893 53. Moisaner PH, Zhang R, Boyle EA, Hewson I, Montoya JP, Zehr JP. Analogous nutrient  
894 limitations in unicellular diazotrophs and *Prochlorococcus* in the South Pacific Ocean. *ISME J.*  
895 2012;6(4):733-44.
- 896 54. Vaccaro R, Hicks S, Jannasch H, Carey F. Occurrence and Role of Glucose in Seawater.  
897 *Limnol Oceanogr.* 1968;13(2):356-60.
- 898 55. Skoog A. Microbial glucose uptake and growth along a horizontal nutrient gradient in the  
899 North Pacific. *Limnol Oceanogr.* 2002;47(6):1676-83.
- 900 56. Hamilton RD, Austin KE. Assay of relative heterotrophic potential in the sea: the use of  
901 specifically labelled glucose. *Canadian Journal of Microbiology.* 1967;13(9):1165-73.
- 902 57. Karl DM. Determination of in situ Microbial Biomass, Viability, Metabolism and  
903 Growth. In: Poindexter JS, Leadbetter ER, editors. *Bacteria in Nature. 2. Methods and Special*  
904 *Applications in Bacterial Ecology.* New York: Plenum Publishing Corporation; 1986. p. 85-176.
- 905 58. Church M, Ducklow H, Karl DM. Light dependence of [<sup>3</sup>H]- Leucine incorporation in the  
906 oligotrophic North Pacific Ocean. *Appl Environ Microbiol.* 2004;70(7):4079-87.
- 907 59. Michelou V, Cottrell M, Kirchman D. Light-stimulated bacterial production and amino  
908 acid assimilation by cyanobacteria and other microbes in the North Atlantic Ocean. *Appl*  
909 *Environ Microbiol.* 2007;73(17):5539-46.
- 910 60. Gómez-Pereira PR, Hartmann M, Grob C, Tarran GA, Martin AP, Fuchs BM, et al.  
911 Comparable light stimulation of organic nutrient uptake by SAR11 and *Prochlorococcus* in the  
912 North Atlantic subtropical gyre. *ISME J.* 2013;7(3):603-14.
- 913 61. Mary I, Tarran G, Warwick P, Terry M, Scanlan D, Burkill P, et al. Light enhanced  
914 amino acid uptake by dominant bacterioplankton groups in surface waters of the Atlantic Ocean.  
915 *FEMS Microbiol Ecol.* 2008;63:36-45.
- 916 62. Malmstrom RR, Kiene R, Vila M, Kirchman KL. Dimethylsulfoniopropionate (DMSP)  
917 assimilation by *Synechococcus* in the Gulf of Mexico and northwest Atlantic Ocean. *Limnol*  
918 *Oceanogr.* 2005;50:1924-31.
- 919 63. Ruiz-González C, Simó R, Vila-Costa M, Sommaruga R, Gasol J. Sunlight modulates the  
920 relative importance of heterotrophic bacteria and picophytoplankton in DMSP- sulphur uptake.  
921 *ISME J.* 2012;6:650-9.
- 922 64. Casey JR, Lomas MW, Michelou VK, Dyrman ST, Orchard ED, Ammerman JW, et al.  
923 Phytoplankton taxon-specific orthophosphate (Pi) and ATP utilization in the western subtropical  
924 North Atlantic. *Aquat Microb Ecol.* 2009;58(1):31-44.
- 925 65. Cohen SE, Golden SS. Circadian rhythms in cyanobacteria. *Microbiol Mol Biol Rev.*  
926 2015;79(4):373-85.
- 927 66. Braakman R, Follows MJ, Chisholm SW. Metabolic evolution and the self-organization  
928 of ecosystems. *Proc Natl Acad Sci USA.* 2017;114(15):E3091-E100.
- 929 67. Muratore D, Boysen AK, Harke MJ, Becker KW, Casey JR, Coesel SN, et al.  
930 Community-scale synchronization and temporal partitioning of gene expression,  
931 metabolism, and lipid biosynthesis in oligotrophic ocean surface waters. *bioRxiv*

- 932 DOI: <https://www.biorxiv.org/content/101101/20200515098020v2>. 2020.
- 933 68. Mary I, Garczarek L, Tarran G, Kolowrat C, Terry M, Scanlan D, et al. Diel rhythmicity  
934 in amino acid uptake by *Prochlorococcus*. *Environ Microbiol.* 2008;10(8):2124-31.
- 935 69. Gasol JM, Doval MD, Pinhassi J, Calderon-Paz JI, Guixa-Boixareu N, Vaque D, et al.  
936 Diel variations in bacterial heterotrophic activity and growth in the northwestern Mediterranean  
937 Sea. *Mar Ecol Prog Ser.* 1998;164:107-24.
- 938 70. Bryant JA, Aylward FO, Eppley JM, Karl DM, Church MJ, DeLong EF. Wind and  
939 sunlight shape microbial diversity in surface waters of the North Pacific Subtropical Gyre. *ISME*  
940 *J.* 2016;10:1308-22.
- 941 71. Mende DR, Boeuf D, DeLong EF. Persistent core populations shape the microbiome  
942 throughout the water column in the North Pacific Subtropical Gyre. *Front Microbiol.* 2019;10.
- 943 72. Vislova A, Sosa OA, Eppley JM, Romano AE, DeLong EF. Diel Oscillation of Microbial  
944 Gene Transcripts Declines With Depth in Oligotrophic Ocean Waters. *Front Microbiol.*  
945 2019;10:2191.
- 946 73. Poretsky R, Hewson I, Sun S, Allen A, Zehr J, Moran M. Comparative day/night  
947 metatranscriptomic analysis of microbial communities in the North Pacific subtropical gyre.  
948 *Environ Microbiol.* 2009;11(6):1358-75.
- 949 74. Shi YM, Tyson GW, Eppley JM, DeLong EF. Integrated metatranscriptomic and  
950 metagenomic analyses of stratified microbial assemblages in the open ocean. *ISME J.*  
951 2011;5(6):999-1013.
- 952 75. Larkin AA, Blinebry SK, Howes C, Lin Y, Loftus SE, Schmaus CA, et al. Niche  
953 partitioning and biogeography of high light adapted *Prochlorococcus* across taxonomic ranks in  
954 the North Pacific. *ISME J.* 2016;10:1555-67.
- 955 76. West N, Scanlan D. Niche partitioning of *Prochlorococcus* populations in a stratified water  
956 column in the Eastern North Atlantic ocean. *Appl Environ Microbiol.* 1999;65(6):2585-91.
- 957 77. Malmstrom R, Coe A, Kettler G, Martiny A, Frias-Lopez J, Zinser E, et al. Temporal  
958 dynamics of *Prochlorococcus* ecotypes in the Atlantic and Pacific oceans. *ISME J.*  
959 2010;4:1252-64.
- 960 78. Zinser E, Johnson Z, Coe A, Karaca E, Veneziano D, Chisholm S. Influence of light and  
961 temperature on *Prochlorococcus* ecotype distributions in the Atlantic Ocean. *Limnol Oceanogr.*  
962 2007;52(5):2205-20.
- 963 79. Johnson Z, Zinser E, Coe A, McNulty N, Woodward E, Chisholm S. Niche partitioning  
964 among *Prochlorococcus* ecotypes along ocean-scale environmental gradients. *Science.*  
965 2006;311(5768):1737-40.
- 966 80. Hewson I, Paerl RW, Tripp HJ, Zehr JP, Karl DM. Metagenomic potential of microbial  
967 assemblages in the surface waters of the central Pacific Ocean tracks variability in oceanic  
968 habitat. *Limnol Oceanogr.* 2009;54(6):1981-94.
- 969 81. Sudek S, Everroad RC, Gehman ALM, Smith JM, Poirier CL, Chavez FP, et al.  
970 Cyanobacterial distributions along a physico-chemical gradient in the Northeastern Pacific  
971 Ocean. *Environ Microbiol.* 2015;17(10):3692-707.
- 972 82. Chen X, Schreiber K, Appel J, Makowka A, Fahnrich B, Roettger M, et al. The Entner-  
973 Doudoroff pathway is an overlooked glycolytic route in cyanobacteria and plants. *Proc Natl*  
974 *Acad Sci USA.* 2016;113(19):5441-6.
- 975 83. Zinser E, Lindell D, Johnson Z, Futschik M, Steglich C, Coleman M, et al. Choreography  
976 of the transcriptome, photophysiology, and cell cycle of a minimal photoautotroph,  
977 *Prochlorococcus*. *PLOS One.* 2009;4(4):e5135.

- 978 84. Golden S. Timekeeping in bacteria: the cyanobacterial circadian clock. *Curr Opin*  
979 *Microbiol.* 1999;6:535-40.
- 980 85. Pattanayak GK, Lambert G, Bernat K, Rust MJ. Controlling the cyanobacterial clock by  
981 synthetically rewiring metabolism *Cell Rep.* 2015;13:2362-7.
- 982 86. Wood TL, Bridwell-Rabb J, Kim YI, Gao T, Chang YG, Liwang A, et al. The KaiA  
983 protein of the cyanobacterial circadian oscillator is modulated by a redox-active cofactor.  
984 *Proceedings of the National Academy of Sciences of the United States of America.*  
985 2010;107:5804-9.
- 986 87. Seki M, Ohara T, Hearn TJ, Frank A, da Silva V, C,H, Caldana C, et al. Adjustment of  
987 the Arabidopsis circadian oscillator by sugar signalling dictates the regulation of starch  
988 metabolism *Sci Rep.* 2017;7(8305).
- 989 88. Biller SJ, Coe A, Roggensack SE, Chisholm SW. Heterotroph Interactions Alter  
990 *Prochlorococcus* Transcriptome Dynamics during Extended Periods of Darkness. *mSystems.*  
991 2018;3(3).
- 992 89. Coe A, Ghizzoni J, LeGault K, Biller S, Roggensack SE, Chisholm SW. Survival of  
993 *Prochlorococcus* in extended darkness. *Limnol Oceanogr.* 2016;71(4):1375-88.
- 994 90. Coe A, Biller, S.J., Thomas, E., Boulias, K., Bliem, C., Arellano, A., Dooley, K.,  
995 Rasmussen, A.N., LeGault, K., O'Keefe, T.J., Stover, S., Greer, E.L., Chisholm, S.W. Coping  
996 with darkness: The adaptive response of marine picocyanobacterial to repeat light energy  
997 deprivation. *Limnol Oceanogr.* 2021.
- 998 91. Shilova IN, Magasin JD, Mills MM, Robidart JC, Turk-Kubo KA, Zehr JP.  
999 Phytoplankton transcriptomic and physiological responses to fixed nitrogen in the California  
1000 current system. *PLOS One.* 2020;15(4):e0231771.
- 1001 92. Murtagh F, Legendre P. Ward's hierarchical agglomerative clustering method: which  
1002 algorithms implement ward's criterion? *J Classif.* 2014;31:274-95.
- 1003 93. Suzuki R, Shimodaira H. Pvcust: an R package for assessing the uncertainty in  
1004 hierarchical clustering. *Bioinformatics.* 2006;22(12):1540-2.
- 1005 94. Shimodaira H. Approximately unbiased tests of regions using multistep-multiscale  
1006 bootstrap resampling. *Ann Stat.* 2004;32:2616-41.

1007

1008

1009

1010

1011

1012

1013

1014

1015

1016 **Titles and legends to main figures**

| Sample #  | Hour of the day | <sup>14</sup> C-PP-WW (nmol C l <sup>-1</sup> h <sup>-1</sup> ) | <sup>3</sup> H-Glc-WW (pmol C l <sup>-1</sup> h <sup>-1</sup> ) | <sup>14</sup> C-Glc-WW (pmol C l <sup>-1</sup> h <sup>-1</sup> ) | PRO cell# (10 <sup>8</sup> l <sup>-1</sup> ) | <sup>14</sup> C-PP-PRO (nmol l <sup>-1</sup> h <sup>-1</sup> ) | <sup>3</sup> H-Glc-PRO (pmol l <sup>-1</sup> h <sup>-1</sup> ) |
|-----------|-----------------|-----------------------------------------------------------------|-----------------------------------------------------------------|------------------------------------------------------------------|----------------------------------------------|----------------------------------------------------------------|----------------------------------------------------------------|
| 1 (Day 1) | 6-10            | 20.3±1.2                                                        | 30.4±0.3                                                        | 64.5±13.2                                                        | 0.89                                         | 5.25±1.54<br><b>26% ww</b>                                     | 0.51±0.06<br><b>1.7% ww</b><br><b>0.06% Pro</b>                |
| 2         | 12-16           | 28.6±0.8                                                        | 30.3±1.1                                                        | 54.1±2                                                           | 1.41                                         | 8.40±1.38<br><b>30% ww</b>                                     | 1.03±0.21<br><b>3.4% ww</b><br><b>0.08% Pro</b>                |
| 3         | 18-22           | 2.6±1.0                                                         | 14.5±0.1                                                        | 28.2±0.6                                                         | 1.57                                         | 1.51±0.45<br><b>67% ww</b>                                     | 0.40±0.06<br><b>2.8% ww</b><br><b>0.18% Pro</b>                |
| 4         | 24-4            | -                                                               | 26.6±2.1                                                        | 55.2                                                             | 0.80                                         | -                                                              | 0.32±0.06<br><b>1.23% ww</b>                                   |
| 5 (Day 2) | 6-10            | 24.7±0.1                                                        | 28.6±0.5                                                        | 57.1±1.1                                                         | 0.88                                         | 9.79±0.88<br><b>40% ww</b>                                     | 0.67±0.13<br><b>2.3% ww</b><br><b>0.04% Pro</b>                |
| 6         | 12-16           | 27.0±0.7                                                        | 26.3±1.9                                                        | 55.2±1.9                                                         | 1.90                                         | 15.62±2.27<br><b>58% ww</b>                                    | 1.52±0.00<br><b>5.8% ww</b><br><b>0.06% Pro</b>                |
| 7         | 18-22           | 0.8±0.00                                                        | 15.2±0.4                                                        | 28.7±1.4                                                         | 1.43                                         | 1.10±0.75<br><b>100% ww</b>                                    | 0.42±0.01<br><b>2.8% ww</b><br><b>0.31% Pro</b>                |
| 8         | 24-4            | -                                                               | 24.2±1.0                                                        | 45.1±1.4                                                         | 0.93                                         | -                                                              | 0.40±0.01<br><b>1.65% ww</b>                                   |
| 9 (Day 3) | 6-10            | 25.7±3.7                                                        | 23.0±2.4                                                        | 46.0±10.2                                                        | 1.10                                         | 9.79±2.22<br><b>39% ww</b>                                     | 0.69±0.08<br><b>3% ww</b><br><b>0.04% Pro</b>                  |
| 10        | 12-16           | 23.8                                                            | 20.6±1.7                                                        | 41.4±1.9                                                         | 1.40                                         | 29.83±0.06<br><b>100% ww</b>                                   | 0.85±0.04<br><b>4.1% ww</b><br><b>0.02% Pro</b>                |

1017

1018 **Table 1.** Rates of inorganic carbon fixation (<sup>14</sup>C-PP; primary productivity) and assimilation of  
 1019 glucose (<sup>3</sup>H-Glu and <sup>14</sup>C-Glu) by the whole water communities (WW), *Prochlorococcus* cell  
 1020 abundance (PRO cell#), *Prochlorococcus* sodium bicarbonate fixation (<sup>14</sup>C-PP-PRO) and  
 1021 glucose assimilation (<sup>3</sup>H-Glc-PRO) during the diel study. The values presented in the table are  
 1022 average of two technical replicates and the standard deviation.  
 1023 Percentages (%) in bold in the <sup>14</sup>C-PP-PRO column show the relative contribution by  
 1024 *Prochlorococcus* to total (WW) primary production. The <sup>3</sup>H-Glc-PRO column shows the %  
 1025 glucose assimilation by *Prochlorococcus* relative to community glucose assimilation (WW), and  
 1026 the carbon contribution from glucose to inorganic carbon fixation by *Prochlorococcus* (Pro).

1027

1028

1029



|                                                                 | <i>Whole community</i>                                                                     | <i>Prochlorococcus</i>                                                                                                                                                                                                                                                                                                            | <i>Synechococcus</i>                                                                              |
|-----------------------------------------------------------------|--------------------------------------------------------------------------------------------|-----------------------------------------------------------------------------------------------------------------------------------------------------------------------------------------------------------------------------------------------------------------------------------------------------------------------------------|---------------------------------------------------------------------------------------------------|
| <b>Carbon fixation</b><br>( <sup>14</sup> C-sodium bicarbonate) | 26.4 day/<br>undetectable at night<br>(nmol l <sup>-1</sup> h <sup>-1</sup> ) <sup>a</sup> | 1.22 day / undetectable at night (fg C cell <sup>-1</sup> h <sup>-1</sup> ) <sup>a</sup><br>or 13.1 day/ undetectable at night (nmol l <sup>-1</sup> h <sup>-1</sup> ) <sup>a*</sup><br><br>0.9 to 1.6 (fg C cell <sup>-1</sup> h <sup>-1</sup> ) <sup>b</sup><br><br>1.2 (fg C cell <sup>-1</sup> h <sup>-1</sup> ) <sup>c</sup> |                                                                                                   |
| <b>Glucose</b><br>( <sup>3</sup> H-glucose)                     | 24<br>(pmol l <sup>-1</sup> h <sup>-1</sup> ) <sup>a</sup>                                 | 0.007 day /0.003 night (amol cell <sup>-1</sup> h <sup>-1</sup> ) <sup>a</sup> or<br>0.9 day /0.4 night (pmol l <sup>-1</sup> h <sup>-1</sup> ) <sup>a*</sup><br><br>0.0048<br>(amol cell <sup>-1</sup> h <sup>-1</sup> ) <sup>d</sup><br><br>0.0026<br>(amol cell <sup>-1</sup> h <sup>-1</sup> ) <sup>e</sup>                   | Undetectable <sup>a</sup><br><br>0.006<br>(amol cell <sup>-1</sup> h <sup>-1</sup> ) <sup>e</sup> |
| <b>Glucose</b><br>( <sup>14</sup> C-glucose)                    | 45.7<br>(pmol l <sup>-1</sup> h <sup>-1</sup> ) <sup>a</sup>                               | Undetectable <sup>a</sup>                                                                                                                                                                                                                                                                                                         | Undetectable <sup>a</sup>                                                                         |

a This study

b Determined in the subtropical North Atlantic Ocean. Duhamel et al., (3).

c Determined in the subtropical and tropical Northeast Atlantic Ocean. Jardillier et al., (4).

d Calculated on the basis of the reported data. Determined in the South Pacific Ocean. Duhamel et al., (11).

e Determined in the Atlantic Ocean. Muñoz-Marín et al., (14)

\*Using cell abundances

1030  
1031  
1032  
1033  
1034  
1035  
1036  
1037  
1038  
1039  
1040  
1041  
1042  
1043  
1044  
1045  
1046  
1047

**Table 2.** Rates of inorganic carbon fixation and glucose assimilation by the whole community, and by *Prochlorococcus* and *Synechococcus* reported for natural samples. In this study, the detection limits are defined as 2X the blank before it being subtracted from the sample.

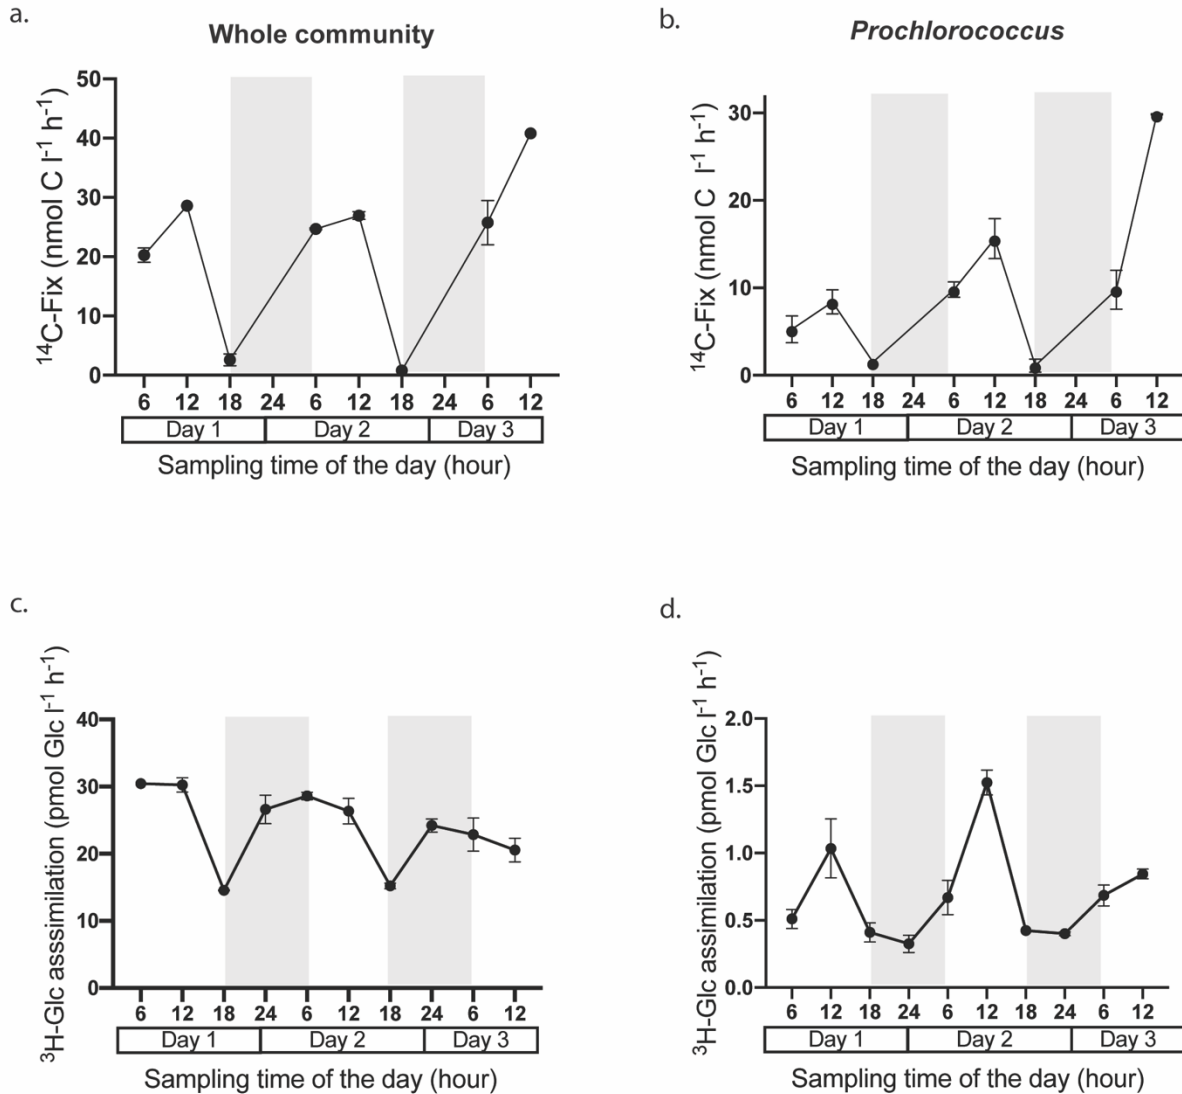

1048

1049

1050 **Figure 1.** Top panel (a, b): Inorganic carbon fixation rates over time by the whole community (a;

1051 total, > 0.2  $\mu\text{m}$ ; nmol C l<sup>-1</sup> h<sup>-1</sup>), and by *Prochlorococcus* (b; nmol C l<sup>-1</sup> h<sup>-1</sup>). Bottom panel (c, d):

1052 Glucose assimilation over time by the whole community (c; total, > 0.2  $\mu\text{m}$ ; pmol Glc l<sup>-1</sup> h<sup>-1</sup>),

1053 and by *Prochlorococcus* as a group (d; pmol Glc l<sup>-1</sup> h<sup>-1</sup>). The shaded area represents the dark

1054 period.

1055

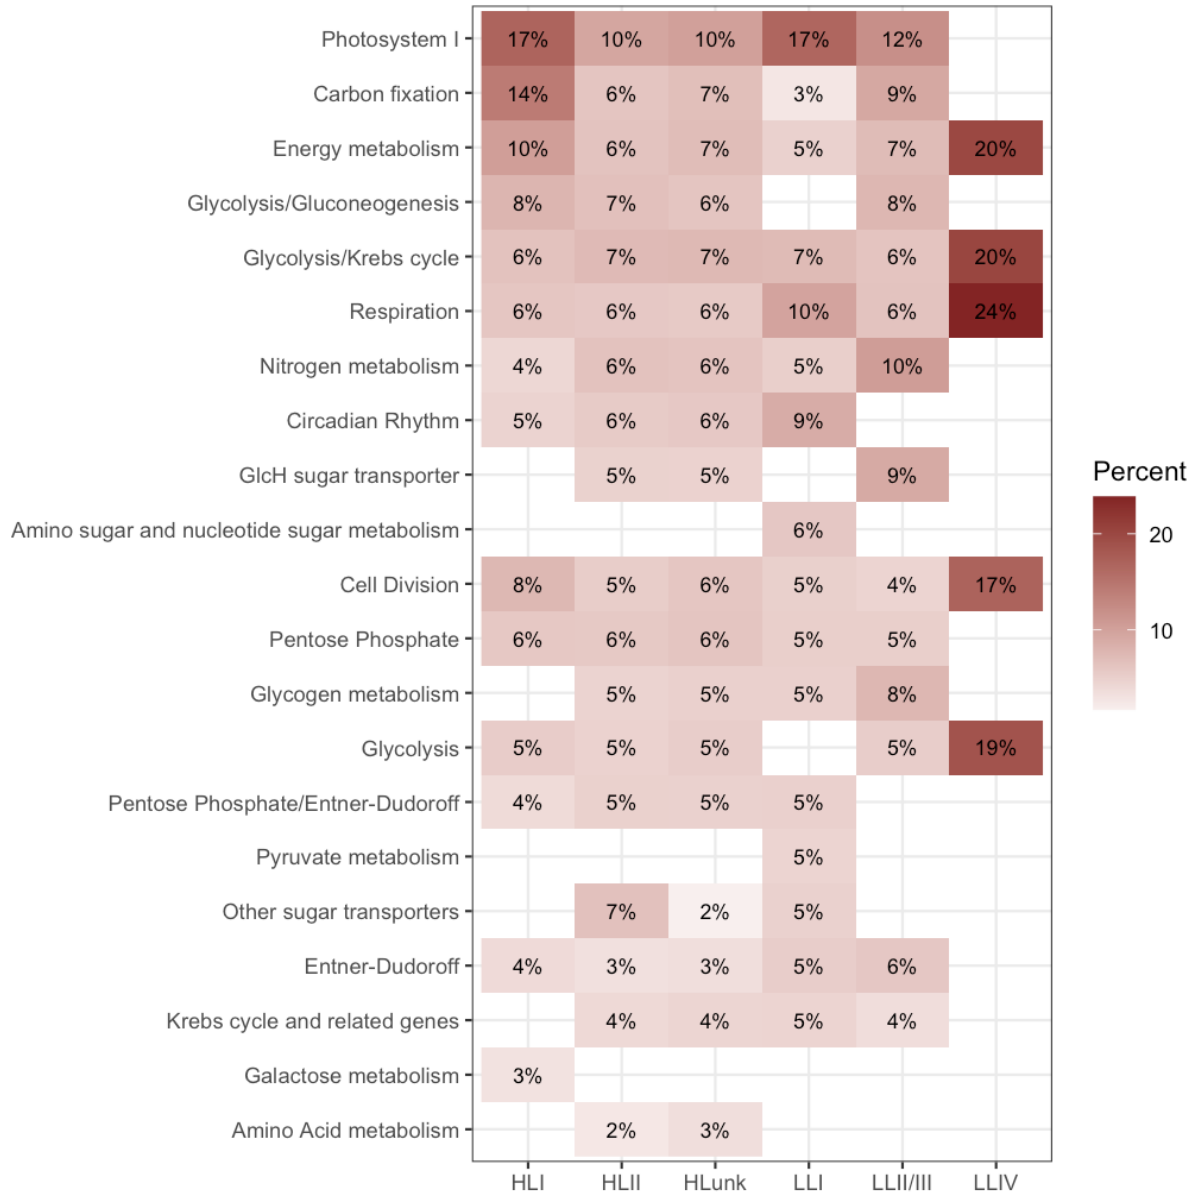

1056  
1057  
1058  
1059  
1060  
1061  
1062  
1063  
1064  
1065  
1066

**Figure 2.** The heat map shows the transcription level across pathways (rows) in the controls for each *Prochlorococcus* clade (column). Within each control sample and for each clade, pathways were normalized for different gene counts by taking the mean transcript level for genes in the pathway. Pathway mean transcript levels were then summed and the percentages calculated. The percentages shown are the averages over control samples. Photosystem I had the highest percentages (excluding LLIV) and is therefore the top row. Empty cells indicate pathways that were not detected in the controls. The fraction of the transcription levels of the LLIV strains are likely overestimates because only 9–10% of LLIV genes on the microarray were detected.

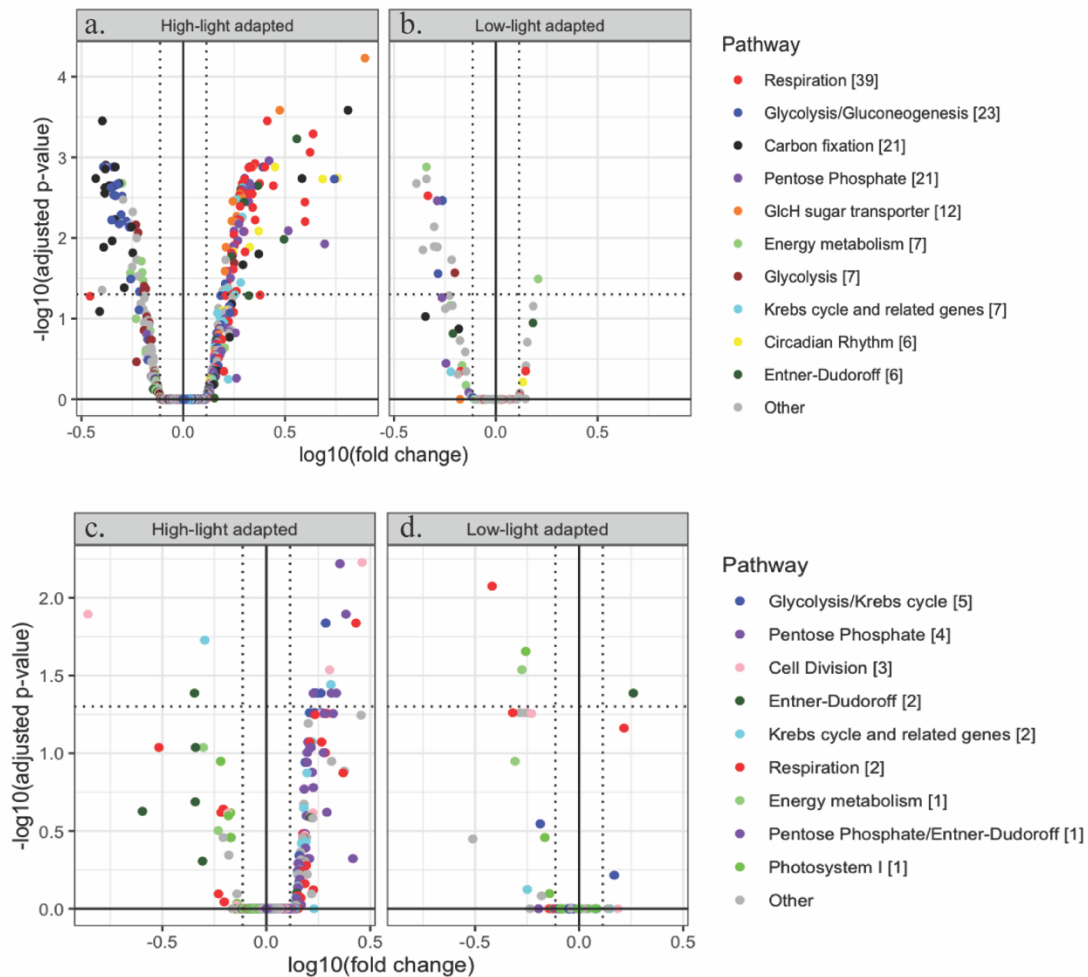

1067  
1068

1069 **Figure 3.** Top panel: A total of 157 DE genes from *Prochlorococcus* were identified in 2D\_12h,  
1070 the 12 h incubation that terminated at 4:00. Bottom panel: A total of 19 DE genes from  
1071 *Prochlorococcus* were identified in 2D\_24h, the 24 h incubation that terminated in day light at  
1072 12:00. The pathways and counts for the DE genes are in the legend. All detected genes from the  
1073 pathways are shown in the plots separately for High-Light (a, c) and Low-Light (b, d) adapted  
1074 *Prochlorococcus*. The DE genes are in the upper left and right sections of each plot, delimited by  
1075 vertical dotted lines for fold changes  $> 1.3$  and a horizontal dotted line for adjusted p-values  $<$   
1076 0.05.

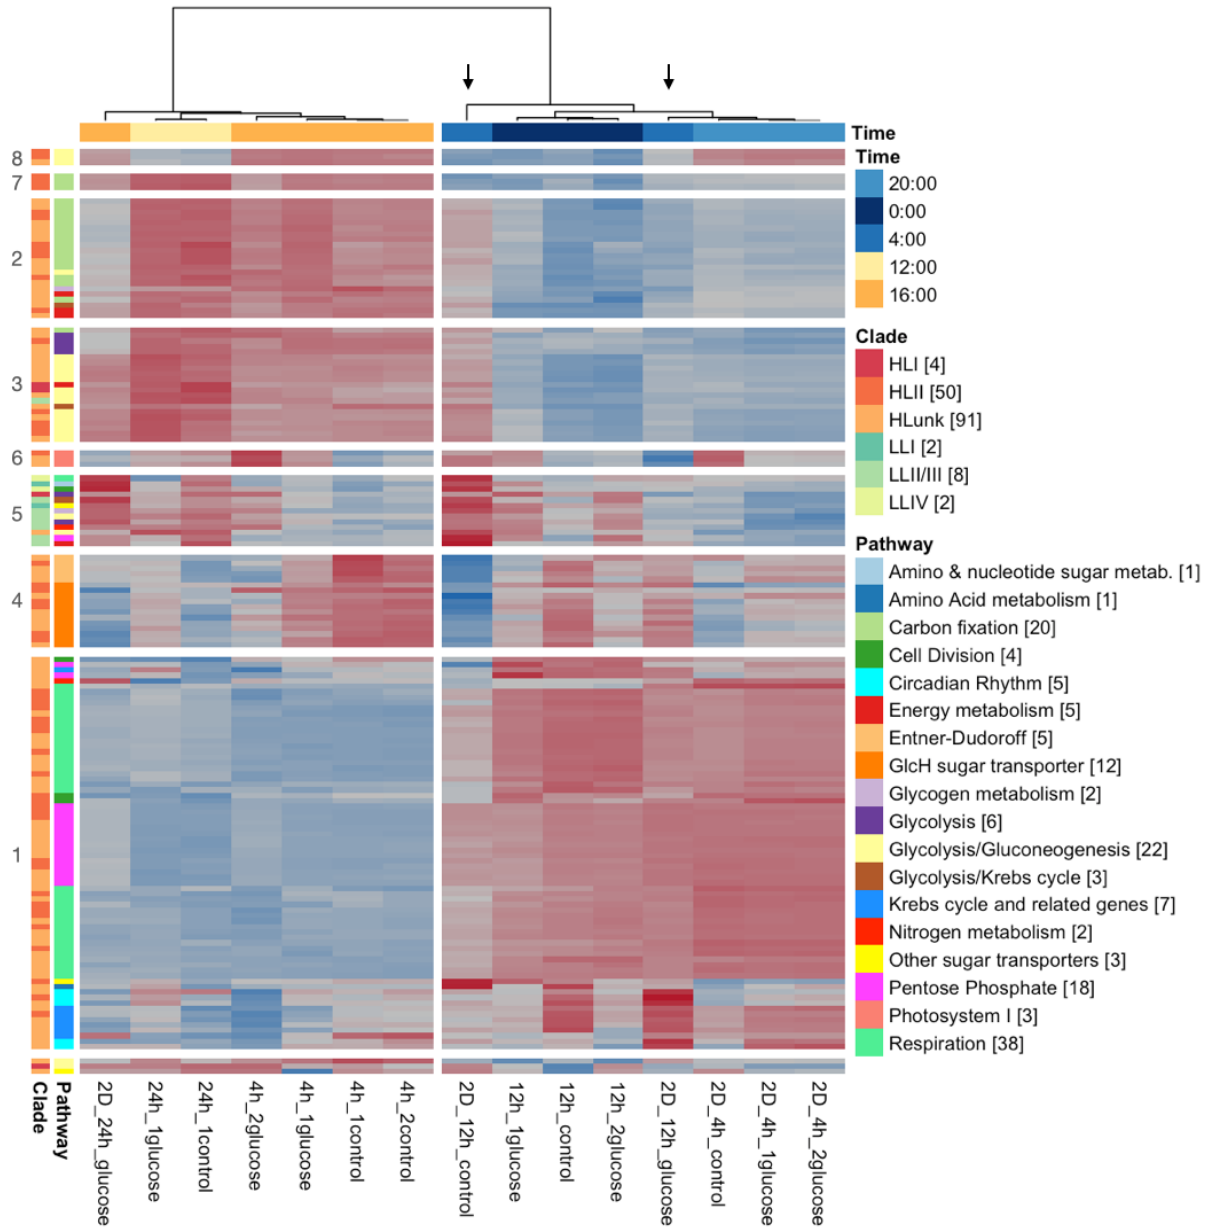

1077  
 1078 **Figure 4.** The heat map shows the 157 *Prochlorococcus* genes that were DE in 2D\_12h glucose  
 1079 versus control (marked by arrows). Samples were hierarchically clustered (92) based on the  
 1080 Euclidean distances between 1 minus their Pearson correlations of the  $\log_2$  transcript levels for  
 1081 the 157 DE genes. The two main sample clusters followed day and night and were significant  
 1082 (both had 97% support using multistep-multiscale bootstrap resampling with 10,000 bootstraps  
 1083 (93, 94). Genes (rows) had their  $\log_2$  transcript levels standardized (mean=0, s.d.=1) prior to  
 1084 gene hierarchical clustering. Thus, transcription intensities (blue-red scale) should only be  
 1085 compared gene-wise, having lower transcription levels in blue or higher in red. Genes were  
 1086 hierarchically clustered using the same approach as the samples, and eight significant clusters  
 1087 were identified (>95% support). The bottom three genes are not members of the clusters. Row-  
 1088 side annotations include the numbers of DE genes from the category in brackets.
